# Supplementary material for: Effects of dietary fibers or probiotics on functional constipation symptoms and roles of gut microbiota: a double-blinded randomized placebo trial
Source: PubMed Central journal article supplement — Gut Microbes. 2023 Apr 20;15(1):2197837. doi: 10.1080/19490976.2023.2197837 (PMC10120550; doi:10.1080/19490976.2023.2197837), 2023-04-20
Supplement: KGMI_A_2197837_SM7781.pdf [file KGMI_A_2197837_SM7781.pdf]

**Effects of dietary fibers or probiotics on functional constipation symptoms and roles of gut microbiota: a double-blinded randomized placebo trial**

**Supplemental materials**

**Table S1. Changes of constipation symptoms over the intervention by group.**

**Table S2. Changes in biochemical parameters.**

**Table S3. Adverse events recorded in the study.**

**Table S4. The difference and ratio of relative genus abundance between intervention groups and the placebo group.**

**Table S5: Partial correlation between the 4-week change in *Bifidobacterium* abundance and changes in constipation symptoms by group.**

**Table S6: Partial correlations between changes of continuously changed bacterial genera abundance and changes in constipation symptoms.**

**Table S7: The top 10 KEGG pathways and top 10 modules based on PICSRUSt-2 functional profiling from the constantly changed genera.**

**Table S8: The top10 KEGG pathways and top10 modules based on PICSRUSt-2 functional profiling for the differential genera predicting responsiveness.**

**Table S9: Dietary and lifestyle counselling materials.**

**Table S10: Assessment and analyses details of gut microbiota.**

**Figure S1 Study flow.**

**Figure S2. Microbiota diversity in each stage by group.**

**Table S1. Changes of Constipation symptoms over the intervention by group <sup>a</sup>.**

| Symptom       | Placebo      | Group A      | <i>P</i> <sup>b</sup> | Group B      | <i>P</i> <sup>b</sup> | Group C      | <i>P</i> <sup>b</sup> | Group D      | <i>P</i> <sup>b</sup> |
|---------------|--------------|--------------|-----------------------|--------------|-----------------------|--------------|-----------------------|--------------|-----------------------|
| BMF           |              |              |                       |              |                       |              |                       |              |                       |
| Week 1-week 0 | 1.07 ± 2.85  | 0.77 ± 2.40  | 0.672                 | 1.35 ± 1.99  | 0.220                 | 1.18 ± 2.59  | 0.210                 | 0.88 ± 1.76  | 0.805                 |
| Week 2-week 0 | 2.04 ± 3.01  | 1.95 ± 2.53  | 0.721                 | 1.89 ± 2.40  | 0.640                 | 2.01 ± 2.29  | 0.520                 | 1.68 ± 2.21  | 0.903                 |
| Week 3-week 0 | 2.29 ± 2.24  | 2.20 ± 2.28  | 0.831                 | 2.53 ± 2.40  | 0.786                 | 2.16 ± 2.18  | 0.814                 | 1.90 ± 1.79  | 0.632                 |
| Week 4-week 0 | 2.24 ± 2.78  | 1.97 ± 2.41  | 0.925                 | 2.40 ± 2.53  | 0.408                 | 2.29 ± 2.04  | 0.395                 | 2.02 ± 2.30  | 0.853                 |
| BSS           |              |              |                       |              |                       |              |                       |              |                       |
| Week 2-week 0 | 0.51 ± 1.43  | 0.86 ± 1.23  | 0.196                 | 0.53 ± 1.37  | 0.519                 | 0.98 ± 1.07  | 0.051                 | 0.86 ± 1.59  | 0.176                 |
| Week 4-week 0 | 0.35 ± 1.51  | 0.96 ± 1.43  | 0.056                 | 0.96 ± 1.50  | 0.037                 | 0.94 ± 1.41  | 0.058                 | 1.04 ± 1.67  | 0.042                 |
| DDS           |              |              |                       |              |                       |              |                       |              |                       |
| Week 2-week 0 | -0.73 ± 0.95 | -0.72 ± 1.03 | 0.904                 | -1.06 ± 0.99 | 0.108                 | -0.74 ± 0.97 | 0.890                 | -0.80 ± 1.03 | 0.750                 |
| Week 4-week 0 | -0.33 ± 1.12 | -0.33 ± 0.90 | 0.994                 | -0.55 ± 1.14 | 0.428                 | -0.43 ± 0.95 | 0.787                 | -0.14 ± 0.99 | 0.330                 |

Data are mean ± SD

<sup>a</sup> n= 50 for each group with the following exceptions: week 1 (group C: n = 49, placebo: n = 49), week 2 (group B: n = 49, group C: n = 47, placebo: n = 48), week 3 (group A: n = 49, group B: n = 49, group C: n = 47, placebo: n = 48), week 4 (group A: n = 49, group B: n = 49, group C: n = 47, placebo: n = 48).

<sup>b</sup> Wilcoxon rank-sum test was used for comparing changes from baseline to each visit time between each intervention group and placebo.

BMF, bowel movement frequency; BSS, Bristol stool scale score; DDS, Defecation difficulty score.

**Table S2. Changes in biochemical parameters**

| Biochemical Variable | Overall<br>(n = 242) | Group A<br>(n = 48) | Group B<br>(n = 49) | Group C<br>(n = 47) | Group D<br>(n = 50) | Placebo<br>(n = 48) | P Value |       |              |
|----------------------|----------------------|---------------------|---------------------|---------------------|---------------------|---------------------|---------|-------|--------------|
|                      |                      |                     |                     |                     |                     |                     | Group   | Time  | Time × Group |
| GLU (mmol/L)         |                      |                     |                     |                     |                     |                     | 0.013   | 0.361 | 0.459        |
| Week 0               | 5.01 (4.75, 5.54)    | 5.08 (4.78, 5.69)   | 5.02 (4.70, 5.32)   | 4.97 (4.83, 5.26)   | 5.03 (4.80, 5.60)   | 5.00 (4.68, 6.01)   |         |       |              |
| Week 4               | 5.04 (4.69, 5.52)    | 5.19 (4.72, 5.46)   | 5.00 (4.68, 5.35)   | 4.89 (4.64, 5.40)   | 5.08 (4.77, 5.66)   | 5.01 (4.66, 5.82)   |         |       |              |
| △                    | -0.04 (-0.29, 0.25)  | -0.02 (-0.28, 0.33) | -0.03 (-0.26, 0.25) | -0.13 (-0.33, 0.07) | -0.03 (-0.25, 0.47) | -0.14 (-0.33, 0.13) |         |       |              |
| TC (mmol/L)          |                      |                     |                     |                     |                     |                     | 0.266   | 0.138 | 0.665        |
| Week 0               | 4.67 ± 0.95          | 4.90 ± 0.85         | 4.55 ± 0.97         | 4.62 ± 0.86         | 4.64 ± 0.89         | 4.64 ± 1.16         |         |       |              |
| Week 4               | 4.72 ± 0.94          | 4.92 ± 0.84         | 4.57 ± 1.00         | 4.66 ± 0.88         | 4.66 ± 0.86         | 4.81 ± 1.08         |         |       |              |
| △                    | 0.05 ± 0.56          | 0.02 ± 0.56         | 0.02 ± 0.52         | 0.05 ± 0.50         | 0.02 ± 0.60         | 0.17 ± 0.60         |         |       |              |
| TG (mmol/L)          |                      |                     |                     |                     |                     |                     | 0.323   | 0.024 | 0.995        |
| Week 0               | 1.09 (0.77, 1.46)    | 1.06 (0.86, 1.56)   | 1.08 (0.71, 1.29)   | 1.14 (0.71, 1.35)   | 1.21 (0.78, 1.86)   | 1.05 (0.75, 1.48)   |         |       |              |
| Week 4               | 1.18 (0.90, 1.69)    | 1.14 (0.93, 1.56)   | 1.13 (0.89, 1.54)   | 1.24 (0.93, 1.71)   | 1.35 (0.92, 2.04)   | 1.14 (0.81, 1.77)   |         |       |              |
| △                    | 0.09 (-0.13, 0.30)   | 0.03 (-0.17, 0.19)  | 0.05 (-0.13, 0.34)  | 0.13 (-0.09, 0.33)  | 0.15 (-0.16, 0.35)  | 0.13 (-0.10, 0.28)  |         |       |              |
| HDL-C (mmol/L)       |                      |                     |                     |                     |                     |                     | 0.827   | 0.055 | 0.672        |
| Week 0               | 1.31 (1.11, 1.53)    | 1.35 (1.12, 1.59)   | 1.32 (1.16, 1.59)   | 1.34 (1.11, 1.42)   | 1.29 (1.08, 1.46)   | 1.29 (1.13, 1.52)   |         |       |              |
| Week 4               | 1.33 (1.13, 1.55)    | 1.38 (1.10, 1.49)   | 1.33 (1.18, 1.57)   | 1.31 (1.17, 1.49)   | 1.31 (1.08, 1.57)   | 1.38 (1.18, 1.54)   |         |       |              |
| △                    | 0.01 (-0.07, 0.09)   | -0.01 (-0.06, 0.07) | -0.02 (-0.10, 0.09) | 0.00 (-0.08, 0.08)  | 0.03 (-0.04, 0.09)  | 0.02 (-0.06, 0.10)  |         |       |              |
| LDL-C (mmol/L)       |                      |                     |                     |                     |                     |                     | 0.305   | 0.057 | 0.792        |
| Week 0               | 2.85 ± 0.82          | 3.04 ± 0.76         | 2.73 ± 0.85         | 2.81 ± 0.74         | 2.84 ± 0.80         | 2.83 ± 0.93         |         |       |              |
| Week 4               | 2.91 ± 0.79          | 3.08 ± 0.70         | 2.78 ± 0.82         | 2.86 ± 0.76         | 2.85 ± 0.75         | 2.97 ± 0.91         |         |       |              |
| △                    | 0.06 ± 0.47          | 0.04 ± 0.47         | 0.05 ± 0.46         | 0.05 ± 0.44         | 0.01 ± 0.51         | 0.13 ± 0.48         |         |       |              |

Data were mean ± SD and median (interquartile range) for normal or non-normal distribution variable.

GLU, glucose; HDL-C, high density lipoprotein-cholesterol; LDL-C, low density lipoprotein cholesterol; TC, cholesterol; TG, triglyceride.

P values were determined by generalized estimating equations, adjusted for age, sex.

△ Changes from week 0 to week 4.

**Table S3. Adverse events recorded in the study.**

| Adverse Event          | Group A | Group B | Group C | Group D | Placebo |
|------------------------|---------|---------|---------|---------|---------|
| Slight dizziness       | 0       | 0       | 1       | 0       | 0       |
| Acute gastroenteritis  | 0       | 0       | 0       | 0       | 1       |
| Stomachache            | 1       | 0       | 1       | 1       | 0       |
| Bloating               | 1       | 2       | 2       | 1       | 0       |
| Farting increasing     | 1       | 2       | 1       | 1       | 0       |
| Diarrhea               | 0       | 2       | 0       | 1       | 0       |
| Tenesmus               | 2       | 1       | 0       | 0       | 0       |
| Appetite decreased     | 0       | 0       | 0       | 1       | 2       |
| Hemorrhoids aggravated | 0       | 0       | 0       | 1       | 0       |

Data are the numbers of events

**Table S4. The difference and ratio of relative genus abundance between intervention groups and the placebo group.**

| Genera                          | Group A              |                    | Group B              |                    | Group C              |                    | Group D              |                    |
|---------------------------------|----------------------|--------------------|----------------------|--------------------|----------------------|--------------------|----------------------|--------------------|
|                                 | Q value <sup>a</sup> | ratio <sup>b</sup> |
| <b>Week 0</b>                   |                      |                    |                      |                    |                      |                    |                      |                    |
| g Adlercreutzia                 | 0.9844               | 0.5597             | 0.9859               | 0.5410             | 0.9626               | 0.6152             | 0.9852               | 0.3654             |
| g Agathobacter                  | 0.9869               | 1.3577             | 0.9672               | 0.7122             | 0.9642               | 0.7730             | 0.9868               | 0.9697             |
| g Akkermansia                   | 0.9656               | 2.2021             | 0.9787               | 2.9946             | 0.8044               | 2.9953             | 0.8788               | 2.6512             |
| g Alistipes                     | 0.9721               | 0.8109             | 0.9831               | 0.8039             | 0.9827               | 0.7553             | 0.9868               | 0.9895             |
| g Allisonella                   | 0.9783               | 0.7273             | 0.9405               | 0.9796             | 0.8959               | 0.4743             | 0.9122               | 0.4364             |
| g Anaerostipes                  | 0.9590               | 0.7188             | 0.9861               | 0.5940             | 0.9826               | 0.6149             | 0.9871               | 0.6220             |
| g Anaerotruncus                 | 0.9828               | 0.5714             | 0.9763               | 0.5598             | 0.9810               | 0.6957             | 0.9853               | 0.6400             |
| g Bacteroides                   | 0.9716               | 1.1160             | 0.9804               | 1.0865             | 0.9849               | 1.0204             | 0.9837               | 1.0327             |
| g Barnesiella                   | 0.9859               | 0.9294             | 0.9814               | 0.9215             | 0.9732               | 0.5748             | 0.9856               | 0.9519             |
| g Bifidobacterium               | 0.8844               | 1.4011             | 0.9376               | 1.8328             | 0.9518               | 1.0820             | 0.9324               | 1.7412             |
| g Bilophila                     | 0.9830               | 1.0432             | 0.9858               | 0.8163             | 0.9648               | 1.3977             | 0.9740               | 0.8474             |
| g Blautia                       | 0.9761               | 0.7225             | 0.9680               | 0.7956             | 0.9829               | 1.0347             | 0.9776               | 0.7338             |
| g Butyricicoccus                | 0.8655               | 1.0065             | 0.8044               | 1.0083             | 0.9034               | 0.9347             | 0.8561               | 1.1945             |
| g Butyricimonas                 | 0.9558               | 1.9231             | 0.9841               | 1.4485             | 0.9873               | 1.1237             | 0.9652               | 1.6000             |
| g CAG-352                       | 0.9839               | 0.7787             | 0.9841               | 1.2820             | 0.8950               | 1.2373             | 0.9855               | 0.3436             |
| g CAG-56                        | 0.9552               | 0.5204             | 0.8044               | 0.2949             | 0.9708               | 0.5111             | 0.9077               | 0.5192             |
| g Christensenellaceae R-7 group | 0.9523               | 2.5538             | 0.8044               | 3.4361             | 0.8044               | 3.5104             | 0.9428               | 2.7077             |
| g Clostridium innocuum group    | 0.9802               | 0.5000             | 0.9453               | 2.2857             | 0.8876               | 2.9565             | 0.9481               | 1.9200             |
| g Clostridium sensu stricto 1   | 0.9856               | 0.4481             | 0.9470               | 1.3115             | 0.9799               | 4.5902             | 0.9610               | 1.9410             |
| g Colidextribacter              | 0.9762               | 1.0394             | 0.9537               | 0.6479             | 0.8908               | 1.1092             | 0.9680               | 0.8164             |
| g Collinsella                   | 0.9779               | 1.0609             | 0.9694               | 1.0825             | 0.9688               | 1.9138             | 0.9673               | 0.8450             |
| g Coprobacter                   | 0.9750               | 3.0588             | 0.9393               | 7.8367             | 0.9797               | 4.1739             | 0.9813               | 0.6494             |
| g Coprococcus                   | 0.9788               | 0.8500             | 0.9761               | 1.4265             | 0.9698               | 1.6859             | 0.9820               | 1.2510             |
| g Desulfovibrio                 | 0.9661               | 1.5294             | 0.9836               | 0.8759             | 0.8044               | 2.4184             | 0.9697               | 1.1068             |
| g Dialister                     | 0.8708               | 1.7904             | 0.8044               | 1.3600             | 0.8044               | 1.8234             | 0.8044               | 1.3377             |
| g Dorea                         | 0.9542               | 1.0000             | 0.9827               | 0.7731             | 0.9810               | 0.8423             | 0.9620               | 0.9815             |
| g Eggerthella                   | 0.9818               | 0.8000             | 0.9392               | 2.6122             | 0.9843               | 3.2696             | 0.9847               | 1.0880             |
| g Eisenbergiella                | 0.8871               | 1.8125             | 0.9754               | 2.9388             | 0.9866               | 1.6957             | 0.9829               | 2.2200             |
| g Erysipelatoclostridium        | 0.9302               | 7.0000             | 0.8044               | 11.7551            | 0.8044               | 20.8696            | 0.8170               | 9.6000             |
| g Erysipelotrichaceae UCG-003   | 0.9848               | 0.8612             | 0.9595               | 0.8109             | 0.9809               | 1.0185             | 0.9461               | 1.1208             |
| g Escherichia-Shigella          | 0.9651               | 0.4694             | 0.8192               | 0.2818             | 0.9850               | 0.5960             | 0.9746               | 0.5154             |
| g Eubacterium eligens group     | 0.9708               | 1.3780             | 0.9830               | 0.9103             | 0.9852               | 0.9620             | 0.9870               | 1.1403             |
| g Eubacterium hallii group      | 0.9757               | 0.5000             | 0.9832               | 0.5671             | 0.9632               | 0.7864             | 0.9844               | 0.5902             |

|                                                |        |         |        |        |        |         |        |         |
|------------------------------------------------|--------|---------|--------|--------|--------|---------|--------|---------|
| g Eubacterium oxidoreducens group              | 0.9098 | 1.8000  | 0.9790 | 1.1265 | 0.9459 | 0.8870  | 0.9814 | 1.3440  |
| g Eubacterium ruminantium group                | 0.9816 | 1.6099  | 0.9615 | 0.5921 | 0.9805 | 1.2556  | 0.9844 | 0.7279  |
| g Eubacterium siraeum group                    | 0.9218 | 10.2647 | 0.9653 | 5.8487 | 0.9661 | 1.3811  | 0.9798 | 1.2988  |
| g Eubacterium ventriosum group                 | 0.9777 | 1.0844  | 0.9487 | 0.6743 | 0.9689 | 1.9921  | 0.9646 | 1.0535  |
| g Eubacterium xylanophilum group               | 0.9802 | 1.2222  | 0.9849 | 0.5079 | 0.9627 | 1.7005  | 0.9807 | 0.7644  |
| g Faecalibacterium                             | 0.9856 | 0.9846  | 0.9727 | 1.1537 | 0.9859 | 0.9628  | 0.9786 | 0.9814  |
| g Family XIII AD3011 group                     | 0.9669 | 2.0769  | 0.9663 | 2.2606 | 0.9628 | 3.6120  | 0.8317 | 2.4369  |
| g Family XIII UCG-001                          | 0.9866 | 1.3636  | 0.9853 | 0.8905 | 0.9849 | 1.2806  | 0.9827 | 0.9164  |
| g Flavonifractor                               | 0.9709 | 1.2513  | 0.8295 | 1.1367 | 0.9663 | 1.5847  | 0.8900 | 1.8379  |
| g Fusicatenibacter                             | 0.9804 | 0.7588  | 0.9610 | 1.1234 | 0.9851 | 0.7754  | 0.9572 | 1.7036  |
| g Fusobacterium                                | 0.9842 | 22.1364 | 0.9754 | 3.6735 | 0.9426 | 13.6601 | 0.9841 | 10.2109 |
| g GCA-900066575                                | 0.9756 | 1.3333  | 0.9827 | 3.9184 | 0.9354 | 2.0870  | 0.9836 | 1.6000  |
| g Haemophilus                                  | 0.9823 | 1.6000  | 0.9325 | 1.7455 | 0.9804 | 0.7779  | 0.9796 | 2.1469  |
| g Holdemanella                                 | 0.9840 | 0.8919  | 0.9806 | 0.1589 | 0.9864 | 0.6204  | 0.9676 | 1.8162  |
| g Holdemania                                   | 0.9773 | 2.2857  | 0.9529 | 2.7988 | 0.9817 | 1.3416  | 0.9830 | 1.2343  |
| g Hungatella                                   | 0.9863 | 2.1304  | 0.9741 | 1.6610 | 0.8970 | 1.4064  | 0.9854 | 5.9687  |
| g Intestinibacter                              | 0.9792 | 1.1053  | 0.9633 | 1.2288 | 0.9858 | 1.5469  | 0.9873 | 0.9684  |
| g Intestinimonas                               | 0.9864 | 1.7500  | 0.9832 | 1.8367 | 0.9590 | 2.3478  | 0.9870 | 1.0800  |
| g Klebsiella                                   | 0.9076 | 0.5422  | 0.9734 | 8.0610 | 0.9744 | 3.4322  | 0.9704 | 1.7928  |
| g Lachnoclostridium                            | 0.9871 | 0.7980  | 0.9855 | 1.0576 | 0.9756 | 1.1989  | 0.9841 | 1.0070  |
| g Lachnospira                                  | 0.9362 | 1.2202  | 0.9867 | 0.9288 | 0.9849 | 0.9840  | 0.9844 | 1.0806  |
| g Lachnospiraceae FCS020 group                 | 0.9836 | 0.8000  | 0.9874 | 1.1755 | 0.9223 | 2.0870  | 0.9538 | 1.3440  |
| g Lachnospiraceae NC2004 group                 | 0.9859 | 0.6000  | 0.9811 | 0.5224 | 0.9549 | 1.5304  | 0.9802 | 0.5120  |
| g Lachnospiraceae ND3007 group                 | 0.9615 | 1.6271  | 0.8044 | 1.8596 | 0.9408 | 1.6271  | 0.8542 | 1.6434  |
| g Lachnospiraceae NK4A136 group                | 0.9809 | 1.3677  | 0.9819 | 0.8988 | 0.9865 | 1.1009  | 0.9827 | 1.3097  |
| g Lachnospiraceae UCG-001                      | 0.9054 | 1.7200  | 0.8559 | 1.7371 | 0.8322 | 2.1426  | 0.9747 | 1.1904  |
| g Lachnospiraceae UCG-004                      | 0.9701 | 1.1502  | 0.9847 | 1.1604 | 0.9777 | 1.1196  | 0.9852 | 1.0136  |
| g Lachnospiraceae UCG-010                      | 0.9869 | 0.9412  | 0.9589 | 0.6242 | 0.9853 | 0.7059  | 0.9798 | 0.8188  |
| g Lactobacillus                                | 0.8044 | 5.7778  | 0.8044 | 6.1224 | 0.8961 | 4.7246  | 0.8044 | 5.0400  |
| g Marvinbryantia                               | 0.9828 | 1.4375  | 0.9837 | 0.7959 | 0.9612 | 1.8913  | 0.9863 | 0.9600  |
| g Megamonas                                    | 0.9640 | 0.9231  | 0.8059 | 0.1613 | 0.9826 | 0.6691  | 0.9640 | 0.5515  |
| g Megasphaera                                  | 0.9842 | 0.8161  | 0.9831 | 0.6535 | 0.9840 | 1.8051  | 0.9868 | 1.3440  |
| g Monoglobus                                   | 0.9652 | 0.4781  | 0.9414 | 0.5591 | 0.9242 | 0.4462  | 0.9777 | 0.5091  |
| g NK4A214 group                                | 0.9655 | 1.9495  | 0.9502 | 1.6806 | 0.9544 | 1.9003  | 0.9357 | 2.9813  |
| g norank f Christensenellaceae                 | 0.9853 | 0.8182  | 0.9871 | 1.2468 | 0.9674 | 1.5178  | 0.9860 | 0.7855  |
| g norank f Coriobacteriales Incertae Sedis     | 0.9779 | 0.7778  | 0.9782 | 0.9796 | 0.9017 | 3.2464  | 0.9610 | 0.7467  |
| g norank f Eubacterium coprostanoligenes group | 0.9796 | 0.9311  | 0.9565 | 1.0342 | 0.9740 | 0.7989  | 0.9544 | 1.3172  |
| g norank f Lachnospiraceae                     | 0.9684 | 0.7455  | 0.9106 | 0.7124 | 0.9378 | 0.6261  | 0.9853 | 0.9076  |

|                                                |        |        |        |         |        |         |        |         |
|------------------------------------------------|--------|--------|--------|---------|--------|---------|--------|---------|
| g norank f Muribaculaceae                      | 0.8044 | 2.0435 | 0.9764 | 1.8953  | 0.8044 | 9.3913  | 0.8044 | 8.3478  |
| g norank f norank o Clostridia UCG-014         | 0.9861 | 1.0486 | 0.9859 | 0.9415  | 0.9852 | 1.4800  | 0.9870 | 1.4213  |
| g norank f norank o Clostridia vadinBB60 group | 0.9783 | 1.5000 | 0.9805 | 1.3605  | 0.9822 | 0.9275  | 0.9738 | 2.7200  |
| g norank f norank o RF39                       | 0.9606 | 2.4706 | 0.9851 | 0.9104  | 0.9760 | 1.0312  | 0.9504 | 0.9713  |
| g norank f norank o Rhodospirillales           | 0.9289 | 6.5128 | 0.9567 | 3.8430  | 0.9813 | 0.8027  | 0.9628 | 2.6831  |
| g norank f Oscillospiraceae                    | 0.9870 | 1.0392 | 0.9722 | 1.1525  | 0.9653 | 1.4936  | 0.9865 | 1.2612  |
| g norank f Ruminococcaceae                     | 0.9845 | 1.1241 | 0.9398 | 1.7345  | 0.9408 | 3.3501  | 0.9836 | 1.6710  |
| g norank f UCG-010                             | 0.9237 | 1.7353 | 0.9867 | 1.9016  | 0.9808 | 1.3504  | 0.8044 | 3.7553  |
| g Odoribacter                                  | 0.9380 | 1.4848 | 0.9717 | 1.3655  | 0.9853 | 1.1067  | 0.8618 | 1.8764  |
| g Oscillibacter                                | 0.9675 | 1.0398 | 0.9695 | 0.8850  | 0.9489 | 1.1680  | 0.9851 | 0.8236  |
| g Oscillospira                                 | 0.9774 | 0.7000 | 0.9614 | 0.4898  | 0.9858 | 1.1478  | 0.9829 | 1.0560  |
| g Oxalobacter                                  | 0.9505 | 1.6364 | 0.9806 | 0.4453  | 0.9827 | 0.9486  | 0.9695 | 1.3091  |
| g Paludicola                                   | 0.9612 | 2.7500 | 0.9588 | 3.6735  | 0.9865 | 1.8261  | 0.9830 | 1.6800  |
| g Parabacteroides                              | 0.8044 | 1.1810 | 0.9477 | 1.3621  | 0.8044 | 1.2919  | 0.8632 | 1.1246  |
| g Paraprevotella                               | 0.9850 | 4.1458 | 0.9870 | 1.4082  | 0.9854 | 1.4348  | 0.8850 | 3.4400  |
| g Parasutterella                               | 0.9850 | 1.2163 | 0.9873 | 1.1636  | 0.9819 | 1.5463  | 0.9658 | 1.1739  |
| g Peptococcus                                  | 0.9552 | 1.5000 | 0.9824 | 0.7347  | 0.9664 | 2.6087  | 0.8962 | 2.1600  |
| g Phascolarctobacterium                        | 0.8044 | 0.4761 | 0.8044 | 0.5381  | 0.9642 | 0.8231  | 0.9474 | 0.6270  |
| g Prevotella                                   | 0.9663 | 0.4926 | 0.9856 | 0.7197  | 0.9856 | 0.4446  | 0.9815 | 0.6365  |
| g Pyramidobacter                               | 0.9810 | 1.2500 | 0.9537 | 40.6531 | 0.8044 | 13.5652 | 0.8044 | 26.8800 |
| g Romboutsia                                   | 0.8248 | 1.6055 | 0.8044 | 2.1839  | 0.9851 | 2.1635  | 0.9698 | 1.5325  |
| g Roseburia                                    | 0.9811 | 1.3447 | 0.9838 | 1.0589  | 0.9722 | 1.2983  | 0.9816 | 1.3429  |
| g Ruminococcus                                 | 0.9853 | 1.2198 | 0.9533 | 1.3184  | 0.9571 | 1.4777  | 0.9838 | 1.1198  |
| g Ruminococcus gnavreuii group                 | 0.9849 | 0.8000 | 0.9827 | 0.7401  | 0.9871 | 1.1362  | 0.9820 | 0.7893  |
| g Ruminococcus gnavus group                    | 0.9714 | 1.0083 | 0.9579 | 3.4893  | 0.9828 | 1.8369  | 0.9802 | 0.7855  |
| g Ruminococcus torques group                   | 0.9341 | 0.7753 | 0.9802 | 0.9128  | 0.9589 | 1.1858  | 0.9690 | 1.2170  |
| g Senegalimassilia                             | 0.9868 | 1.7895 | 0.9869 | 1.1343  | 0.9869 | 0.8787  | 0.9853 | 0.8084  |
| g Streptococcus                                | 0.9869 | 1.7500 | 0.9818 | 1.8101  | 0.9872 | 1.0548  | 0.9763 | 1.0643  |
| g Subdoligranulum                              | 0.9640 | 1.1241 | 0.9801 | 1.0444  | 0.8044 | 1.6776  | 0.9825 | 0.9358  |
| g Sutterella                                   | 0.9694 | 1.3160 | 0.9844 | 1.0945  | 0.9801 | 0.7736  | 0.9744 | 1.6947  |
| g Terrisporobacter                             | 0.9776 | 0.6667 | 0.8053 | 3.0694  | 0.9872 | 0.6957  | 0.9832 | 1.6000  |
| g Turicibacter                                 | 0.9510 | 1.2000 | 0.9329 | 1.0776  | 0.9607 | 2.1913  | 0.8044 | 2.3040  |
| g Tyzzerella                                   | 0.9862 | 0.9474 | 0.9798 | 1.7916  | 0.9824 | 1.8398  | 0.9600 | 0.9095  |
| g UBA1819                                      | 0.9809 | 0.8140 | 0.9270 | 1.4124  | 0.9699 | 1.9656  | 0.9350 | 1.8084  |
| g UCG-002                                      | 0.9652 | 1.2900 | 0.9473 | 1.5720  | 0.9772 | 1.2449  | 0.9852 | 1.2534  |
| g UCG-003                                      | 0.8044 | 2.0859 | 0.8733 | 1.7712  | 0.9474 | 1.6074  | 0.9708 | 1.5079  |
| g UCG-005                                      | 0.9631 | 2.4706 | 0.9505 | 1.8295  | 0.9734 | 1.5090  | 0.9489 | 2.9976  |
| g unclassified c Clostridia                    | 0.9360 | 2.1406 | 0.9207 | 1.5000  | 0.9656 | 2.0217  | 0.9491 | 1.6650  |

|                                        |        |         |        |         |        |        |        |        |
|----------------------------------------|--------|---------|--------|---------|--------|--------|--------|--------|
| g unclassified f Enterobacteriaceae    | 0.9849 | 0.0565  | 0.9864 | 0.0866  | 0.9850 | 0.1846 | 0.9609 | 0.0330 |
| g unclassified f Lachnospiraceae       | 0.9691 | 1.0718  | 0.9850 | 0.8987  | 0.9338 | 1.2385 | 0.9868 | 0.9326 |
| g unclassified f Oscillospiraceae      | 0.8106 | 1.6757  | 0.9775 | 1.2179  | 0.8044 | 2.0024 | 0.9824 | 1.3232 |
| g unclassified f Peptostreptococcaceae | 0.9577 | 2.3333  | 0.9822 | 1.9592  | 0.9514 | 2.7826 | 0.9604 | 2.5600 |
| g unclassified f Ruminococcaceae       | 0.9663 | 5.3250  | 0.8044 | 3.1837  | 0.9501 | 2.0087 | 0.9226 | 2.7120 |
| g unclassified k norank d Bacteria     | 0.9790 | 1.2979  | 0.9685 | 0.8337  | 0.9855 | 1.2877 | 0.9771 | 0.8374 |
| g unclassified o Bacteroidales         | 0.9418 | 1.8333  | 0.9773 | 0.7347  | 0.9657 | 1.9130 | 0.9811 | 1.4400 |
| g unclassified o Oscillospirales       | 0.9855 | 1.0000  | 0.9849 | 1.0340  | 0.9694 | 1.6812 | 0.9867 | 1.0133 |
| g unclassified p Firmicutes            | 0.9807 | 0.8667  | 0.9851 | 1.0449  | 0.9737 | 0.9739 | 0.9840 | 1.0240 |
| g Veillonella                          | 0.9744 | 12.7429 | 0.8863 | 15.9534 | 0.9853 | 6.1714 | 0.9575 | 2.5234 |
| g Victivallis                          | 0.9620 | 2.0000  | 0.9480 | 2.2391  | 0.8551 | 2.0373 | 0.9529 | 1.1429 |
| <b>Week 2</b>                          |        |         |        |         |        |        |        |        |
| g Adlercreutzia                        | 0.9031 | 0.6909  | 0.8808 | 0.8547  | 0.8944 | 1.0844 | 0.7591 | 0.5082 |
| g Agathobacter                         | 0.9227 | 0.8151  | 0.8241 | 0.7266  | 0.8067 | 0.7753 | 0.9121 | 0.8956 |
| g Akkermansia                          | 0.8379 | 1.7729  | 0.7860 | 0.9576  | 0.8939 | 2.0049 | 0.9179 | 1.0840 |
| g Alistipes                            | 0.6988 | 0.5663  | 0.3144 | 0.3473  | 0.5885 | 0.4851 | 0.5953 | 0.5073 |
| g Allisonella                          | 0.8569 | 1.6596  | 0.9044 | 1.8367  | 0.7801 | 2.3478 | 0.8365 | 1.3200 |
| g Anaerostipes                         | 0.4709 | 1.5603  | 0.5706 | 1.8866  | 0.8210 | 1.3527 | 0.7723 | 3.1689 |
| g Anaerotruncus                        | 0.7969 | 0.2723  | 0.8160 | 0.5224  | 0.8764 | 0.4174 | 0.8126 | 0.3840 |
| g Bacteroides                          | 0.8982 | 0.9544  | 0.7678 | 1.2243  | 0.8624 | 1.1315 | 0.8341 | 1.1096 |
| g Barnesiella                          | 0.8938 | 0.7660  | 0.8138 | 0.5078  | 0.8101 | 0.5519 | 0.9115 | 0.8387 |
| g Bifidobacterium                      | 0.3144 | 1.5345  | 0.7998 | 1.0468  | 0.7048 | 0.9500 | 0.7906 | 0.9736 |
| g Bilophila                            | 0.9208 | 0.7810  | 0.8773 | 0.5629  | 0.9168 | 0.8310 | 0.8807 | 0.5777 |
| g Blautia                              | 0.7948 | 0.6916  | 0.8046 | 0.8591  | 0.7355 | 0.7136 | 0.8030 | 0.8080 |
| g Butyricoccus                         | 0.8812 | 0.9188  | 0.9134 | 1.0817  | 0.9186 | 1.1361 | 0.9087 | 0.9563 |
| g Butyricimonas                        | 0.9141 | 1.4247  | 0.5678 | 0.6318  | 0.7380 | 0.6887 | 0.8758 | 0.8736 |
| g CAG-352                              | 0.8644 | 0.6119  | 0.9154 | 0.7009  | 0.8270 | 2.1094 | 0.9176 | 0.6869 |
| g CAG-56                               | 0.9261 | 0.8824  | 0.6071 | 0.4780  | 0.9225 | 0.7680 | 0.9193 | 0.9600 |
| g Christensenellaceae R-7 group        | 0.6085 | 2.3262  | 0.9216 | 1.0918  | 0.8378 | 0.9457 | 0.9215 | 1.7267 |
| g Clostridium innocuum group           | 0.6033 | 0.8824  | 0.4884 | 0.6318  | 0.4697 | 1.1315 | 0.7099 | 0.6869 |
| g Clostridium sensu stricto 1          | 0.8247 | 0.6302  | 0.9039 | 0.8913  | 0.8075 | 0.8790 | 0.8464 | 0.8389 |
| g Colidextribacter                     | 0.9103 | 0.7130  | 0.9119 | 0.8933  | 0.8636 | 0.7022 | 0.8949 | 0.8091 |
| g Collinsella                          | 0.7643 | 1.3432  | 0.9161 | 0.8075  | 0.8680 | 1.1909 | 0.9090 | 0.9287 |
| g Coprobacter                          | 0.8614 | 1.1593  | 0.7812 | 0.8649  | 0.7891 | 0.3948 | 0.9088 | 0.3373 |
| g Coprococcus                          | 0.9157 | 0.7852  | 0.8939 | 0.8854  | 0.8543 | 0.8453 | 0.9134 | 0.8875 |
| g Desulfovibrio                        | 0.9077 | 1.3860  | 0.8733 | 1.0076  | 0.8787 | 2.4149 | 0.9232 | 0.9600 |
| g Dialister                            | 0.7698 | 1.6394  | 0.6659 | 1.8767  | 0.7410 | 2.5300 | 0.6070 | 1.7381 |
| g Dorea                                | 0.8043 | 1.0595  | 0.8436 | 1.0254  | 0.6774 | 0.9557 | 0.9052 | 1.6508 |



|                                   |        |        |        |        |        |         |        |        |
|-----------------------------------|--------|--------|--------|--------|--------|---------|--------|--------|
| g Eggerthella                     | 0.8716 | 0.9532 | 0.7931 | 3.2653 | 0.9035 | 0.9739  | 0.9229 | 1.4080 |
| g Eisenbergiella                  | 0.8077 | 0.7748 | 0.9252 | 1.3849 | 0.9109 | 0.5757  | 0.8746 | 0.8607 |
| g Erysipelatoclostridium          | 0.9021 | 1.1348 | 0.7459 | 1.3061 | 0.8952 | 1.3913  | 0.8799 | 1.8133 |
| g Erysipelotrichaceae UCG-003     | 0.7099 | 0.6183 | 0.8045 | 1.4667 | 0.8421 | 1.1450  | 0.8126 | 1.4115 |
| g Escherichia-Shigella            | 0.8168 | 1.6005 | 0.8947 | 1.1366 | 0.9072 | 2.2092  | 0.7645 | 0.7706 |
| g Eubacterium eligens group       | 0.5806 | 1.5277 | 0.7753 | 1.5110 | 0.9259 | 1.2779  | 0.8153 | 1.1152 |
| g Eubacterium hallii group        | 0.8973 | 1.1113 | 0.8731 | 1.1222 | 0.8636 | 1.2274  | 0.8954 | 1.1549 |
| g Eubacterium oxidoreducens group | 0.5607 | 2.6553 | 0.7786 | 2.0571 | 0.9044 | 0.8348  | 0.8086 | 2.1120 |
| g Eubacterium ruminantium group   | 0.7495 | 1.8435 | 0.8941 | 0.2407 | 0.7782 | 1.4945  | 0.7387 | 1.6759 |
| g Eubacterium siraeum group       | 0.8750 | 1.2359 | 0.9157 | 0.6247 | 0.9065 | 0.4083  | 0.9241 | 0.9183 |
| g Eubacterium ventriosum group    | 0.8113 | 1.4515 | 0.8157 | 0.8844 | 0.8568 | 1.2899  | 0.9215 | 1.0978 |
| g Eubacterium xylanophilum group  | 0.8502 | 1.4776 | 0.9090 | 1.0630 | 0.7656 | 2.2202  | 0.9116 | 0.6536 |
| g Faecalibacterium                | 0.7790 | 1.1204 | 0.8160 | 1.3088 | 0.8938 | 1.0337  | 0.8255 | 1.0453 |
| g Family XIII AD3011 group        | 0.8931 | 1.1605 | 0.9138 | 1.0241 | 0.9051 | 0.6166  | 0.8798 | 1.2218 |
| g Family XIII UCG-001             | 0.8435 | 0.9011 | 0.8868 | 0.8643 | 0.8365 | 0.8593  | 0.8931 | 0.4518 |
| g Flavonifractor                  | 0.8403 | 0.5184 | 0.9000 | 0.7920 | 0.9125 | 0.4980  | 0.9130 | 0.5515 |
| g Fusicatenibacter                | 0.4866 | 1.4676 | 0.7273 | 1.5088 | 0.8428 | 0.8300  | 0.6780 | 1.2856 |
| g Fusobacterium                   | 0.9238 | 1.7935 | 0.9083 | 0.9676 | 0.8707 | 20.8696 | 0.9121 | 1.3815 |
| g GCA-900066575                   | 0.7054 | 2.9362 | 0.8057 | 1.9592 | 0.8631 | 1.3043  | 0.8807 | 1.3200 |
| g Haemophilus                     | 0.9127 | 1.1835 | 0.8519 | 2.1881 | 0.8886 | 1.0532  | 0.5991 | 1.0766 |
| g Holdemanella                    | 0.7844 | 1.4209 | 0.9130 | 0.8518 | 0.9030 | 1.0888  | 0.8460 | 2.2122 |
| g Holdemania                      | 0.8723 | 0.8754 | 0.9092 | 0.8397 | 0.8140 | 1.3416  | 0.7655 | 0.1371 |
| g Hungatella                      | 0.7889 | 0.4057 | 0.8809 | 0.3892 | 0.8104 | 0.2144  | 0.8499 | 0.2499 |
| g Intestinibacter                 | 0.9036 | 0.7629 | 0.8288 | 1.1566 | 0.8605 | 1.0058  | 0.8863 | 1.1913 |
| g Intestinimonas                  | 0.9236 | 1.0213 | 0.8607 | 0.5714 | 0.7945 | 1.8261  | 0.8600 | 0.6400 |
| g Klebsiella                      | 0.7648 | 0.1406 | 0.8016 | 3.0598 | 0.9171 | 0.9731  | 0.9188 | 0.5501 |
| g Lachnoclostridium               | 0.8924 | 1.1856 | 0.8079 | 2.0643 | 0.9031 | 1.5372  | 0.9099 | 1.1054 |
| g Lachnospira                     | 0.7610 | 1.3868 | 0.7561 | 2.0327 | 0.8096 | 1.3456  | 0.7516 | 1.5211 |
| g Lachnospiraceae FCS020 group    | 0.7687 | 0.5106 | 0.9173 | 1.5673 | 0.8429 | 2.0870  | 0.9027 | 1.5360 |
| g Lachnospiraceae NC2004 group    | 0.8035 | 1.9404 | 0.8540 | 1.3714 | 0.9092 | 0.8348  | 0.8612 | 1.3440 |
| g Lachnospiraceae ND3007 group    | 0.8641 | 1.5985 | 0.5841 | 1.5333 | 0.5971 | 1.8299  | 0.7619 | 1.6417 |
| g Lachnospiraceae NK4A136 group   | 0.8980 | 1.2185 | 0.7894 | 0.7566 | 0.9198 | 1.1307  | 0.7831 | 0.7525 |
| g Lachnospiraceae UCG-001         | 0.9067 | 0.8151 | 0.8002 | 1.7237 | 0.7159 | 1.3645  | 0.8350 | 0.8308 |
| g Lachnospiraceae UCG-004         | 0.8512 | 0.8671 | 0.7061 | 1.2031 | 0.9264 | 0.8229  | 0.9227 | 0.8408 |
| g Lachnospiraceae UCG-010         | 0.9054 | 1.0093 | 0.8107 | 0.8989 | 0.8881 | 0.9575  | 0.8589 | 0.6438 |
| g Lactobacillus                   | 0.8001 | 8.2530 | 0.6428 | 7.5455 | 0.8166 | 3.9201  | 0.8650 | 4.7481 |
| g Marvinbryantia                  | 0.8031 | 1.3050 | 0.9255 | 0.7619 | 0.9155 | 0.5797  | 0.8739 | 1.0667 |
| g Megamonas                       | 0.7619 | 0.6555 | 0.7303 | 0.4710 | 0.9106 | 0.6219  | 0.8054 | 0.5535 |

|                                                |        |        |        |        |        |        |        |        |
|------------------------------------------------|--------|--------|--------|--------|--------|--------|--------|--------|
| g Megasphaera                                  | 0.8156 | 0.7375 | 0.7936 | 0.3240 | 0.9187 | 0.8080 | 0.8425 | 0.9867 |
| g Monoglobus                                   | 0.8831 | 1.3878 | 0.8111 | 2.0670 | 0.8545 | 0.9886 | 0.8376 | 2.8754 |
| g NK4A214 group                                | 0.8996 | 1.3240 | 0.9004 | 1.1335 | 0.8562 | 1.5280 | 0.8117 | 1.5360 |
| g norank f Christensenellaceae                 | 0.9101 | 0.9362 | 0.9029 | 0.9796 | 0.8322 | 0.5217 | 0.8113 | 0.4800 |
| g norank f Coriobacteriales Incertae Sedis     | 0.7717 | 3.9049 | 0.8133 | 1.1525 | 0.7667 | 5.4015 | 0.8542 | 1.8635 |
| g norank f Eubacterium coprostanoligenes group | 0.9259 | 1.0275 | 0.9232 | 1.0246 | 0.8388 | 0.6232 | 0.8162 | 0.6630 |
| g norank f Lachnospiraceae                     | 0.8160 | 1.0750 | 0.9154 | 0.9796 | 0.8274 | 0.9886 | 0.8133 | 0.6400 |
| g norank f Muribaculaceae                      | 0.8078 | 2.2307 | 0.8146 | 0.6702 | 0.6096 | 8.4577 | 0.4888 | 9.6253 |
| g norank f norank o Clostridia UCG-014         | 0.8078 | 0.7703 | 0.9015 | 0.4377 | 0.8943 | 0.5140 | 0.9114 | 0.7598 |
| g norank f norank o Clostridia vadinBB60 group | 0.9156 | 0.5419 | 0.7306 | 0.2599 | 0.6958 | 0.1917 | 0.8140 | 0.6073 |
| g norank f norank o RF39                       | 0.7529 | 2.6944 | 0.9151 | 1.0630 | 0.8789 | 1.5097 | 0.7434 | 2.0834 |
| g norank f norank o Rhodospirillales           | 0.8066 | 2.3607 | 0.6852 | 5.1067 | 0.8986 | 0.7014 | 0.7262 | 0.8656 |
| g norank f Oscillospiraceae                    | 0.4755 | 0.6950 | 0.7517 | 0.8707 | 0.7805 | 0.6957 | 0.3852 | 0.5733 |
| g norank f Ruminococcaceae                     | 0.8169 | 1.7508 | 0.8139 | 0.8918 | 0.8621 | 1.0056 | 0.5626 | 0.6090 |
| g norank f UCG-010                             | 0.8116 | 1.6368 | 0.7552 | 0.5636 | 0.8636 | 0.6861 | 0.8964 | 1.4071 |
| g Odoribacter                                  | 0.8874 | 1.1830 | 0.6581 | 0.4980 | 0.8147 | 0.8783 | 0.8463 | 0.9040 |
| g Oscillibacter                                | 0.8017 | 0.6547 | 0.7700 | 0.7577 | 0.7636 | 0.9721 | 0.5425 | 0.6195 |
| g Oscillospira                                 | 0.9217 | 1.2766 | 0.9257 | 1.2245 | 0.9131 | 0.8696 | 0.5951 | 0.1600 |
| g Oxalobacter                                  | 0.7390 | 1.9574 | 0.7947 | 0.7347 | 0.7524 | 0.3478 | 0.8968 | 0.6400 |
| g Paludicola                                   | 0.7939 | 1.6049 | 0.8999 | 4.1983 | 0.8117 | 1.6398 | 0.8809 | 1.0971 |
| g Parabacteroides                              | 0.3144 | 2.6112 | 0.8818 | 1.3840 | 0.7210 | 1.5375 | 0.9168 | 0.9794 |
| g Paraprevotella                               | 0.9187 | 0.6396 | 0.8815 | 0.9499 | 0.9091 | 0.6746 | 0.6053 | 2.4533 |
| g Parasutterella                               | 0.8039 | 1.4628 | 0.8153 | 1.2026 | 0.8168 | 1.6375 | 0.6490 | 1.5744 |
| g Peptococcus                                  | 0.7825 | 3.4723 | 0.7956 | 0.3918 | 0.8699 | 1.2522 | 0.9106 | 1.1520 |
| g Phascolarctobacterium                        | 0.8427 | 1.0770 | 0.7667 | 0.8623 | 0.8026 | 1.1069 | 0.7823 | 0.6389 |
| g Prevotella                                   | 0.9072 | 0.7115 | 0.8938 | 0.7004 | 0.8371 | 0.7482 | 0.8730 | 0.9112 |
| g Pyramidobacter                               | 0.5084 | 0.0056 | 0.8307 | 0.4046 | 0.9055 | 0.0567 | 0.7872 | 0.0991 |
| g Romboutsia                                   | 0.9139 | 0.7557 | 0.8752 | 1.2080 | 0.8901 | 0.7393 | 0.9237 | 0.8222 |
| g Roseburia                                    | 0.8996 | 1.0649 | 0.9094 | 1.1276 | 0.8976 | 0.8663 | 0.8653 | 1.2478 |
| g Ruminococcus                                 | 0.7408 | 2.1138 | 0.8884 | 1.6906 | 0.9007 | 1.4238 | 0.8006 | 1.7937 |
| g Ruminococcus gauvreauii group                | 0.9160 | 0.8511 | 0.8284 | 0.4082 | 0.9052 | 0.6087 | 0.8033 | 1.1400 |
| g Ruminococcus gnavus group                    | 0.7174 | 0.3965 | 0.8746 | 1.0660 | 0.8769 | 1.3565 | 0.9017 | 0.6325 |
| g Ruminococcus torques group                   | 0.3144 | 0.3696 | 0.6974 | 0.7201 | 0.6841 | 0.7573 | 0.7870 | 0.6287 |
| g Senegalimassilia                             | 0.8602 | 5.5830 | 0.8939 | 0.7837 | 0.9232 | 1.0435 | 0.9177 | 0.4480 |
| g Streptococcus                                | 0.9044 | 0.8279 | 0.7350 | 1.5881 | 0.9225 | 0.6877 | 0.8572 | 0.8000 |
| g Subdoligranulum                              | 0.7860 | 1.2805 | 0.9010 | 1.0721 | 0.8791 | 1.2162 | 0.8865 | 1.1432 |
| g Sutterella                                   | 0.9227 | 0.9180 | 0.8892 | 0.7155 | 0.8613 | 0.8153 | 0.9054 | 0.9954 |
| g Terrisporobacter                             | 0.8858 | 2.2979 | 0.6232 | 4.8980 | 0.4199 | 7.5652 | 0.6440 | 3.8400 |

|                                        |        |        |        |        |        |        |        |        |
|----------------------------------------|--------|--------|--------|--------|--------|--------|--------|--------|
| g Turicibacter                         | 0.8799 | 0.9483 | 0.9239 | 1.6793 | 0.9242 | 0.7453 | 0.9193 | 0.6857 |
| g Tyzzerella                           | 0.9093 | 1.2584 | 0.7923 | 0.8397 | 0.8408 | 2.6273 | 0.8196 | 0.9600 |
| g UBA1819                              | 0.8494 | 0.4750 | 0.6073 | 0.9568 | 0.6887 | 0.3883 | 0.7758 | 0.6140 |
| g UCG-002                              | 0.9115 | 0.9257 | 0.8092 | 0.7473 | 0.8747 | 0.7067 | 0.9154 | 0.9775 |
| g UCG-003                              | 0.8907 | 1.0145 | 0.9239 | 1.0612 | 0.8447 | 1.0365 | 0.8544 | 1.2640 |
| g UCG-005                              | 0.8252 | 2.6072 | 0.8669 | 0.8283 | 0.9101 | 1.0689 | 0.8745 | 2.0488 |
| g unclassified c Clostridia            | 0.5385 | 1.5840 | 0.8144 | 1.2995 | 0.7871 | 1.1287 | 0.8867 | 1.0384 |
| g unclassified f Enterobacteriaceae    | 0.9136 | 1.4209 | 0.7480 | 2.2786 | 0.8423 | 3.7883 | 0.8797 | 4.5287 |
| g unclassified f Lachnospiraceae       | 0.8933 | 1.1098 | 0.9241 | 1.1562 | 0.8953 | 1.0489 | 0.8051 | 0.8918 |
| g unclassified f Oscillospiraceae      | 0.9034 | 0.8000 | 0.8666 | 0.6857 | 0.9085 | 0.6435 | 0.8558 | 0.9600 |
| g unclassified f Peptostreptococcaceae | 0.8060 | 2.5532 | 0.9039 | 0.9796 | 0.8137 | 0.2609 | 0.8583 | 2.1600 |
| g unclassified f Ruminococcaceae       | 0.8574 | 1.3495 | 0.8305 | 1.2070 | 0.8198 | 0.8571 | 0.8925 | 1.4057 |
| g unclassified k norank d Bacteria     | 0.6300 | 1.7317 | 0.8950 | 1.4481 | 0.9152 | 1.1342 | 0.8127 | 1.4609 |
| g unclassified o Bacteroidales         | 0.9132 | 0.8298 | 0.8268 | 0.6735 | 0.8952 | 0.7174 | 0.9131 | 0.6600 |
| g unclassified o Oscillospirales       | 0.9181 | 1.3617 | 0.8373 | 2.1769 | 0.8130 | 2.4348 | 0.9057 | 1.2800 |
| g unclassified p Firmicutes            | 0.7898 | 1.2998 | 0.7379 | 0.9796 | 0.7999 | 1.5178 | 0.9212 | 0.7855 |
| g Veillonella                          | 0.9132 | 0.5971 | 0.8151 | 2.2455 | 0.8404 | 1.5090 | 0.8431 | 0.5465 |
| g Victivallis                          | 0.9210 | 0.9719 | 0.7910 | 0.3318 | 0.8835 | 0.3871 | 0.8858 | 0.3406 |
| <b>Week 4</b>                          |        |        |        |        |        |        |        |        |
| g Adlercreutzia                        | 0.9817 | 0.4201 | 0.9843 | 0.4562 | 0.9804 | 0.4193 | 0.9777 | 0.7978 |
| g Agathobacter                         | 0.9835 | 1.1571 | 0.9027 | 0.4189 | 0.8268 | 0.4315 | 0.9834 | 0.6534 |
| g Akkermansia                          | 0.9056 | 1.1706 | 0.9808 | 1.2965 | 0.9623 | 0.4972 | 0.5064 | 1.8522 |
| g Alistipes                            | 0.9311 | 0.5199 | 0.8985 | 0.4994 | 0.9054 | 0.5320 | 0.9612 | 0.5931 |
| g Allisonella                          | 0.9393 | 1.6667 | 0.9795 | 0.6531 | 0.9298 | 3.1304 | 0.9813 | 2.2400 |
| g Anaerostipes                         | 0.9809 | 1.0000 | 0.6507 | 1.7652 | 0.9799 | 1.3390 | 0.9845 | 0.9841 |
| g Anaerotruncus                        | 0.9565 | 0.6364 | 0.8895 | 0.5788 | 0.9554 | 0.8063 | 0.9806 | 1.3527 |
| g Bacteroides                          | 0.9761 | 1.0666 | 0.9132 | 1.2259 | 0.9586 | 1.1350 | 0.9767 | 1.1707 |
| g Barnesiella                          | 0.9827 | 0.6325 | 0.9716 | 0.4647 | 0.9414 | 0.4183 | 0.9824 | 0.5965 |
| g Bifidobacterium                      | 0.3689 | 2.5166 | 0.7490 | 2.2321 | 0.6012 | 2.8489 | 0.9474 | 1.8327 |
| g Bilophila                            | 0.9635 | 0.6842 | 0.9739 | 0.8404 | 0.9471 | 0.7359 | 0.9849 | 0.8893 |
| g Blautia                              | 0.9365 | 0.7712 | 0.9584 | 1.1820 | 0.9748 | 1.2740 | 0.7117 | 0.7409 |
| g Butyricicoccus                       | 0.9341 | 1.3794 | 0.3455 | 1.7282 | 0.9712 | 1.0265 | 0.9779 | 0.9860 |
| g Butyricimonas                        | 0.9528 | 1.4566 | 0.9497 | 0.8210 | 0.9843 | 1.0616 | 0.9236 | 1.5982 |
| g CAG-352                              | 0.9801 | 1.3721 | 0.9809 | 0.5183 | 0.9669 | 1.6684 | 0.9839 | 0.8763 |
| g CAG-56                               | 0.9772 | 1.0152 | 0.9296 | 0.7421 | 0.7684 | 0.3399 | 0.9761 | 0.7855 |
| g Christensenellaceae R-7 group        | 0.9362 | 1.8755 | 0.9693 | 1.0646 | 0.9842 | 1.1892 | 0.9838 | 2.0251 |
| g Clostridium innocuum group           | 0.3807 | 0.0000 | 0.9736 | 2.5714 | 0.9228 | 6.9130 | 0.9724 | 3.4800 |
| g Clostridium sensu stricto 1          | 0.9685 | 1.0306 | 0.9802 | 0.9839 | 0.9573 | 1.2303 | 0.9767 | 1.7230 |

|                                   |        |        |        |        |        |        |        |        |
|-----------------------------------|--------|--------|--------|--------|--------|--------|--------|--------|
| g Colidextribacter                | 0.9420 | 0.9866 | 0.8784 | 0.8284 | 0.7785 | 0.6793 | 0.9723 | 0.9729 |
| g Collinsella                     | 0.9846 | 0.7243 | 0.9536 | 0.4800 | 0.9837 | 0.6639 | 0.9097 | 0.5135 |
| g Coprobacter                     | 0.9767 | 1.5532 | 0.9785 | 1.5215 | 0.9718 | 4.1739 | 0.9671 | 1.9609 |
| g Coprococcus                     | 0.9800 | 1.2824 | 0.9838 | 1.0199 | 0.9801 | 1.0619 | 0.9814 | 1.0758 |
| g Desulfovibrio                   | 0.9814 | 0.5524 | 0.9821 | 0.5480 | 0.9826 | 0.7516 | 0.9786 | 0.5975 |
| g Dialister                       | 0.8920 | 2.0962 | 0.4045 | 1.8016 | 0.6232 | 1.6699 | 0.5317 | 1.4058 |
| g Dorea                           | 0.9793 | 0.9046 | 0.9828 | 1.0634 | 0.9618 | 0.8890 | 0.9794 | 0.9379 |
| g Eggerthella                     | 0.9678 | 1.4167 | 0.9658 | 1.4694 | 0.9581 | 0.9565 | 0.9842 | 2.0400 |
| g Eisenbergiella                  | 0.9808 | 1.1429 | 0.9407 | 1.3994 | 0.9400 | 2.9814 | 0.9848 | 1.8514 |
| g Erysipelatoclostridium          | 0.9802 | 1.7000 | 0.9791 | 0.6367 | 0.9771 | 1.3043 | 0.9831 | 1.3440 |
| g Erysipelotrichaceae UCG-003     | 0.9773 | 1.1480 | 0.9847 | 1.1246 | 0.9766 | 0.7534 | 0.9647 | 1.4206 |
| g Escherichia-Shigella            | 0.8896 | 0.4193 | 0.9773 | 0.6593 | 0.9685 | 0.6258 | 0.9765 | 1.9000 |
| g Eubacterium eligens group       | 0.9026 | 1.3227 | 0.9685 | 0.9024 | 0.9803 | 0.9006 | 0.9742 | 1.2248 |
| g Eubacterium hallii group        | 0.9785 | 0.7352 | 0.9512 | 0.9995 | 0.9705 | 1.1901 | 0.9848 | 0.8662 |
| g Eubacterium oxidoreducens group | 0.9628 | 1.3556 | 0.9334 | 0.4789 | 0.7716 | 0.4406 | 0.9601 | 0.8320 |
| g Eubacterium ruminantium group   | 0.9282 | 1.1168 | 0.9824 | 0.4433 | 0.9418 | 0.8454 | 0.8890 | 1.0791 |
| g Eubacterium siraeum group       | 0.9772 | 0.9041 | 0.9847 | 0.8521 | 0.9757 | 0.2144 | 0.9757 | 0.5260 |
| g Eubacterium ventriosum group    | 0.9239 | 0.7454 | 0.8981 | 0.5639 | 0.8716 | 1.2245 | 0.9603 | 0.6731 |
| g Eubacterium xylanophilum group  | 0.9677 | 0.8667 | 0.9845 | 0.9959 | 0.9642 | 1.4087 | 0.9701 | 1.2480 |
| g Faecalibacterium                | 0.9569 | 1.1676 | 0.9754 | 0.9891 | 0.9608 | 1.1980 | 0.9831 | 1.0251 |
| g Family XIII AD3011 group        | 0.9814 | 0.7333 | 0.9284 | 0.4898 | 0.9770 | 0.8348 | 0.9634 | 1.2800 |
| g Family XIII UCG-001             | 0.9653 | 0.6897 | 0.9566 | 0.6080 | 0.8835 | 0.3958 | 0.9324 | 0.5297 |
| g Flavonifractor                  | 0.9706 | 1.2179 | 0.9812 | 1.0726 | 0.9827 | 0.9910 | 0.9805 | 1.0941 |
| g Fusicatenibacter                | 0.8828 | 1.5350 | 0.9697 | 1.3498 | 0.9702 | 1.2739 | 0.9822 | 1.0242 |
| g Fusobacterium                   | 0.9847 | 1.9202 | 0.9848 | 0.5140 | 0.9303 | 1.9441 | 0.9831 | 0.6607 |
| g GCA-900066575                   | 0.9728 | 1.1818 | 0.9846 | 1.1577 | 0.9846 | 0.6640 | 0.9840 | 0.9600 |
| g Haemophilus                     | 0.8974 | 1.0857 | 0.9600 | 1.2035 | 0.9706 | 0.5292 | 0.9604 | 1.0354 |
| g Holdemanella                    | 0.9806 | 1.2424 | 0.9699 | 1.0093 | 0.9839 | 1.1067 | 0.9684 | 1.6291 |
| g Holdemania                      | 0.9130 | 0.4706 | 0.3767 | 0.1152 | 0.4079 | 0.1841 | 0.9239 | 0.7341 |
| g Hungatella                      | 0.9724 | 1.9000 | 0.9728 | 0.3918 | 0.9672 | 0.6000 | 0.9813 | 0.3600 |
| g Intestinibacter                 | 0.9824 | 1.0714 | 0.9542 | 1.9125 | 0.9766 | 1.0683 | 0.9644 | 1.4057 |
| g Intestinimonas                  | 0.9706 | 0.6111 | 0.9842 | 0.7075 | 0.9799 | 0.6377 | 0.9699 | 0.8533 |
| g Klebsiella                      | 0.9694 | 0.1620 | 0.9837 | 2.4904 | 0.8628 | 1.9988 | 0.9783 | 1.7375 |
| g Lachnoclostridium               | 0.9808 | 1.0100 | 0.9838 | 1.1833 | 0.9678 | 1.5757 | 0.9786 | 1.0080 |
| g Lachnospira                     | 0.9498 | 0.8937 | 0.9763 | 0.8487 | 0.9845 | 0.8723 | 0.8911 | 0.4912 |
| g Lachnospiraceae FCS020 group    | 0.4107 | 4.5000 | 0.9111 | 2.6939 | 0.3743 | 3.6522 | 0.9317 | 2.5200 |
| g Lachnospiraceae NC2004 group    | 0.9798 | 0.8824 | 0.9789 | 1.1525 | 0.9837 | 0.7673 | 0.9627 | 1.4118 |
| g Lachnospiraceae ND3007 group    | 0.9745 | 1.7724 | 0.9418 | 1.3380 | 0.7308 | 1.4677 | 0.9707 | 1.1317 |

|                                                |        |        |        |        |        |        |        |        |
|------------------------------------------------|--------|--------|--------|--------|--------|--------|--------|--------|
| g Lachnospiraceae NK4A136 group                | 0.9832 | 0.5409 | 0.9738 | 0.6469 | 0.9766 | 0.6256 | 0.9541 | 0.6199 |
| g Lachnospiraceae UCG-001                      | 0.9641 | 0.5862 | 0.9693 | 1.5268 | 0.9802 | 1.0147 | 0.9780 | 0.5363 |
| g Lachnospiraceae UCG-004                      | 0.8732 | 1.0567 | 0.9626 | 1.0352 | 0.9642 | 1.1089 | 0.9821 | 1.0546 |
| g Lachnospiraceae UCG-010                      | 0.9814 | 1.0217 | 0.9809 | 0.6282 | 0.9437 | 0.7032 | 0.9771 | 0.9496 |
| g Lactobacillus                                | 0.6546 | 3.8791 | 0.3722 | 1.8408 | 0.9732 | 1.6398 | 0.9759 | 0.8545 |
| g Marvinbryantia                               | 0.9637 | 1.6154 | 0.8537 | 0.5275 | 0.9755 | 0.8027 | 0.5866 | 0.5169 |
| g Megamonas                                    | 0.8856 | 0.4123 | 0.8252 | 0.3981 | 0.9807 | 1.2052 | 0.9732 | 1.1722 |
| g Megasphaera                                  | 0.9252 | 0.5085 | 0.8926 | 0.4770 | 0.9742 | 0.7053 | 0.9401 | 0.1896 |
| g Monoglobus                                   | 0.9744 | 0.7417 | 0.9033 | 1.1386 | 0.9209 | 1.0473 | 0.9524 | 0.8892 |
| g NK4A214 group                                | 0.9824 | 0.9807 | 0.9643 | 1.1498 | 0.9824 | 1.5874 | 0.9522 | 1.1564 |
| g norank f Christensenellaceae                 | 0.9677 | 0.3125 | 0.9662 | 0.3061 | 0.9817 | 0.5217 | 0.9790 | 0.7200 |
| g norank f Coriobacteriales Incertae Sedis     | 0.7529 | 2.4615 | 0.9792 | 1.8085 | 0.6450 | 3.3712 | 0.8913 | 3.9877 |
| g norank f Eubacterium coprostanoligenes group | 0.9438 | 1.4016 | 0.9732 | 1.0233 | 0.9625 | 1.2573 | 0.9697 | 1.0846 |
| g norank f Lachnospiraceae                     | 0.9732 | 1.4000 | 0.8594 | 1.7633 | 0.9654 | 0.8812 | 0.9548 | 1.8347 |
| g norank f Muribaculaceae                      | 0.7296 | 3.3396 | 0.9329 | 1.8483 | 0.4871 | 9.0369 | 0.5284 | 4.7638 |
| g norank f norank o Clostridia UCG-014         | 0.9807 | 1.0484 | 0.9830 | 0.5823 | 0.9811 | 0.6853 | 0.9834 | 1.1188 |
| g norank f norank o Clostridia vadinBB60 group | 0.9683 | 1.2308 | 0.9427 | 1.3187 | 0.9787 | 0.5619 | 0.9075 | 2.3631 |
| g norank f norank o RF39                       | 0.9803 | 1.7600 | 0.9692 | 1.1951 | 0.9722 | 1.0643 | 0.9324 | 2.4576 |
| g norank f norank o Rhodospirillales           | 0.9177 | 3.4091 | 0.9215 | 3.1614 | 0.9467 | 0.4506 | 0.9561 | 0.9818 |
| g norank f Oscillospiraceae                    | 0.9757 | 0.6782 | 0.9713 | 0.7319 | 0.9836 | 0.6237 | 0.9827 | 0.6069 |
| g norank f Ruminococcaceae                     | 0.9843 | 1.0913 | 0.9407 | 0.9381 | 0.9709 | 1.1759 | 0.4113 | 0.5816 |
| g norank f UCG-010                             | 0.9565 | 1.9111 | 0.9804 | 1.7415 | 0.9732 | 1.4841 | 0.9377 | 3.3707 |
| g Odoribacter                                  | 0.5609 | 2.0323 | 0.9701 | 1.2535 | 0.9341 | 1.4474 | 0.9251 | 1.5381 |
| g Oscillibacter                                | 0.9293 | 0.6245 | 0.9848 | 0.9383 | 0.9695 | 0.8145 | 0.9681 | 0.7008 |
| g Oscillospira                                 | 0.9157 | 0.2500 | 0.9706 | 0.5510 | 0.8538 | 0.1957 | 0.9517 | 0.6600 |
| g Oxalobacter                                  | 0.9787 | 0.5000 | 0.9351 | 0.1959 | 0.9788 | 1.0435 | 0.9752 | 1.1520 |
| g Paludicola                                   | 0.8262 | 2.5000 | 0.9536 | 3.9184 | 0.9210 | 2.7826 | 0.8612 | 1.7600 |
| g Parabacteroides                              | 0.3113 | 1.9521 | 0.9256 | 0.9496 | 0.9367 | 1.1784 | 0.9577 | 0.8120 |
| g Paraprevotella                               | 0.9628 | 0.8506 | 0.9776 | 1.0021 | 0.9617 | 1.4033 | 0.4123 | 2.9241 |
| g Parasutterella                               | 0.9577 | 1.5233 | 0.9096 | 1.7194 | 0.9627 | 1.5207 | 0.9247 | 1.4037 |
| g Peptococcus                                  | 0.9715 | 2.2857 | 0.9789 | 2.3790 | 0.9832 | 1.7888 | 0.9790 | 1.9200 |
| g Phascolarctobacterium                        | 0.7379 | 0.5950 | 0.8987 | 0.7359 | 0.8480 | 0.9199 | 0.9480 | 0.9094 |
| g Prevotella                                   | 0.9847 | 0.7594 | 0.9801 | 0.7856 | 0.9737 | 0.6375 | 0.9835 | 0.7899 |
| g Pyramidobacter                               | 0.9126 | 0.1765 | 0.9821 | 1.0948 | 0.9460 | 2.9463 | 0.9493 | 0.3953 |
| g Romboutsia                                   | 0.9647 | 0.8233 | 0.9421 | 0.7892 | 0.8963 | 0.5715 | 0.9738 | 2.0693 |
| g Roseburia                                    | 0.9525 | 1.0224 | 0.9303 | 1.3559 | 0.9658 | 1.0449 | 0.9726 | 0.8485 |
| g Ruminococcus                                 | 0.9800 | 1.0557 | 0.9823 | 1.1501 | 0.9610 | 1.2347 | 0.9748 | 1.2095 |
| g Ruminococcus gauvreauii group                | 0.7477 | 1.5510 | 0.8712 | 0.9596 | 0.9807 | 0.7879 | 0.9312 | 1.4106 |

|                                        |        |        |        |        |        |        |        |        |
|----------------------------------------|--------|--------|--------|--------|--------|--------|--------|--------|
| g Ruminococcus gnavus group            | 0.9636 | 0.8571 | 0.9230 | 3.0243 | 0.8506 | 2.2360 | 0.9789 | 0.5486 |
| g Ruminococcus torques group           | 0.0704 | 0.3241 | 0.8664 | 0.7347 | 0.9313 | 0.8510 | 0.9452 | 0.7663 |
| g Senegalimassilia                     | 0.9356 | 5.0000 | 0.9793 | 2.2041 | 0.9503 | 2.3478 | 0.9740 | 1.4400 |
| g Streptococcus                        | 0.9700 | 1.0428 | 0.9273 | 0.9482 | 0.9748 | 0.8928 | 0.9651 | 0.8933 |
| g Subdoligranulum                      | 0.9795 | 1.0969 | 0.9828 | 0.8220 | 0.9666 | 0.9939 | 0.9841 | 0.8486 |
| g Sutterella                           | 0.9658 | 0.9882 | 0.9777 | 0.7796 | 0.9805 | 0.8889 | 0.9718 | 0.6369 |
| g Terrisporobacter                     | 0.9764 | 1.7742 | 0.9836 | 1.3272 | 0.9340 | 0.2020 | 0.9595 | 1.2387 |
| g Turicibacter                         | 0.9690 | 1.0968 | 0.9617 | 1.1060 | 0.9837 | 1.5484 | 0.9122 | 3.1587 |
| g Tyzzerella                           | 0.9691 | 1.1205 | 0.9796 | 1.2510 | 0.9805 | 2.3510 | 0.9091 | 0.6477 |
| g UBA1819                              | 0.9279 | 0.5702 | 0.9783 | 1.0226 | 0.9817 | 0.5767 | 0.9773 | 0.7747 |
| g UCG-002                              | 0.9559 | 1.0661 | 0.9710 | 0.9796 | 0.9842 | 0.9031 | 0.9743 | 1.3825 |
| g UCG-003                              | 0.9800 | 1.0298 | 0.9825 | 1.0607 | 0.9203 | 0.8258 | 0.9799 | 1.1158 |
| g UCG-005                              | 0.9595 | 1.6466 | 0.9829 | 0.9311 | 0.9702 | 1.0693 | 0.9838 | 1.5061 |
| g unclassified c Clostridia            | 0.9379 | 0.9588 | 0.9782 | 0.9969 | 0.9649 | 0.4972 | 0.9811 | 0.7398 |
| g unclassified f Enterobacteriaceae    | 0.9772 | 1.1148 | 0.9771 | 1.7665 | 0.9575 | 2.7541 | 0.9824 | 1.0859 |
| g unclassified f Lachnospiraceae       | 0.9786 | 1.0803 | 0.9786 | 1.0297 | 0.9764 | 0.7775 | 0.9812 | 0.9776 |
| g unclassified f Oscillospiraceae      | 0.9841 | 1.0676 | 0.9298 | 0.6486 | 0.8134 | 0.5076 | 0.9821 | 1.5438 |
| g unclassified f Peptostreptococcaceae | 0.9624 | 0.9286 | 0.9221 | 2.0991 | 0.9790 | 0.9689 | 0.8313 | 2.3314 |
| g unclassified f Ruminococcaceae       | 0.9542 | 1.5980 | 0.9819 | 1.0564 | 0.9759 | 0.6036 | 0.9240 | 1.8918 |
| g unclassified k norank d Bacteria     | 0.9675 | 1.0000 | 0.9810 | 0.8802 | 0.9810 | 0.7108 | 0.9648 | 1.2939 |
| g unclassified o Bacteroidales         | 0.9803 | 1.5161 | 0.9723 | 0.6320 | 0.9785 | 0.5722 | 0.9832 | 1.2697 |
| g unclassified o Oscillospirales       | 0.9777 | 0.6585 | 0.9807 | 0.7646 | 0.9756 | 0.4072 | 0.9265 | 1.1239 |
| g unclassified p Firmicutes            | 0.9753 | 1.9375 | 0.9839 | 2.5102 | 0.9845 | 0.8478 | 0.9802 | 1.3200 |
| g Veillonella                          | 0.7818 | 2.1064 | 0.7657 | 4.0017 | 0.9596 | 2.3645 | 0.9472 | 1.7668 |
| g Victivallis                          | 0.9709 | 0.9032 | 0.9831 | 0.5688 | 0.9846 | 0.7069 | 0.9830 | 0.6813 |

<sup>a</sup>The difference in the relative genus abundance between any intervention group and the placebo group was tested by using Wilcoxon rank-sum test. FDR-adjusted *P* values (Q value) were presented.

<sup>b</sup>The ratio of mean relative genus abundance between interventions group and the placebo group.

**Table S5. Partial correlation between the 4-week change in *Bifidobacterium* abundance and changes in constipation symptoms by group.**

| Bacterial genera   | Group | r      |        |        | P value |       |       | FDR P value |       |       |
|--------------------|-------|--------|--------|--------|---------|-------|-------|-------------|-------|-------|
|                    |       | BMF    | BSS    | DSS    | BMF     | BSS   | DSS   | BMF         | BSS   | DSS   |
| g__Bifidobacterium | A     | -0.124 | -0.057 | 0.031  | 0.411   | 0.705 | 0.840 | 0.832       | 0.840 | 0.840 |
|                    | B     | 0.133  | -0.219 | -0.050 | 0.379   | 0.145 | 0.743 | 0.832       | 0.832 | 0.840 |
|                    | C     | 0.110  | -0.041 | -0.108 | 0.476   | 0.792 | 0.485 | 0.832       | 0.840 | 0.832 |
|                    | D     | -0.138 | 0.058  | 0.198  | 0.350   | 0.695 | 0.177 | 0.832       | 0.840 | 0.832 |

Partial spearman correlation was used adjusted for age and gender. BMF: bowel movements per week; BSS: Bristol stool scale score; DDS: degree of defecation straining.

**Table S6: Partial correlations between changes of continuously changed bacterial genera abundance and changes in constipation symptoms.**

| Group | Bacterial genera                | r      |        |        | P value      |              |       | FDR P value |       |       |
|-------|---------------------------------|--------|--------|--------|--------------|--------------|-------|-------------|-------|-------|
|       |                                 | BMF    | BSS    | DSS    | BMF          | BSS          | DSS   | BMF         | BSS   | DSS   |
| A     | g__Odoribacter                  | 0.104  | -0.234 | 0.078  | 0.493        | 0.118        | 0.607 | 0.874       | 0.708 | 0.910 |
|       | G__UCG-002                      | -0.083 | -0.298 | 0.107  | 0.583        | <b>0.044</b> | 0.479 | 0.874       | 0.708 | 0.910 |
|       | g__Eisenbergiella               | -0.011 | -0.072 | 0.000  | 0.944        | 0.633        | 0.999 | 0.950       | 0.865 | 0.999 |
|       | g__Megamonas                    | 0.044  | -0.064 | -0.032 | 0.773        | 0.673        | 0.835 | 0.950       | 0.865 | 0.945 |
| B     | g__Escherichia-Shigella         | -0.230 | -0.169 | -0.106 | 0.125        | 0.262        | 0.483 | 0.561       | 0.770 | 0.910 |
|       | g__Anaerostipes                 | 0.207  | -0.008 | -0.021 | 0.168        | 0.960        | 0.891 | 0.604       | 0.960 | 0.945 |
|       | g__Roseburia                    | -0.136 | -0.009 | 0.081  | 0.368        | 0.952        | 0.594 | 0.874       | 0.960 | 0.910 |
|       | g__NK4A214_group                | 0.069  | 0.016  | -0.020 | 0.651        | 0.914        | 0.893 | 0.901       | 0.960 | 0.945 |
| C     | g__Anaerostipes                 | 0.383  | 0.015  | -0.169 | <b>0.010</b> | 0.925        | 0.274 | 0.183       | 0.960 | 0.910 |
|       | g__Ruminococcus_gnavus_group    | 0.258  | 0.169  | 0.200  | 0.091        | 0.273        | 0.192 | 0.561       | 0.770 | 0.910 |
|       | g__norank_f__norank_o__RF39     | -0.014 | -0.204 | -0.038 | 0.928        | 0.185        | 0.808 | 0.950       | 0.770 | 0.945 |
| D     | g__Erysipelatoclostridium       | -0.112 | 0.153  | -0.106 | 0.447        | 0.300        | 0.473 | 0.874       | 0.770 | 0.910 |
|       | g__norank_f__norank_o__RF39     | -0.138 | -0.092 | 0.162  | 0.350        | 0.534        | 0.270 | 0.874       | 0.859 | 0.910 |
|       | g__Lachnospiraceae_ND3007_group | 0.105  | 0.247  | 0.026  | 0.476        | 0.090        | 0.862 | 0.874       | 0.708 | 0.945 |

Partial spearman correlation was used adjusted for age and gender. Bold *P* value denoted that the correlation was significant. BMF, bowel movements frequency; BSS, Bristol stool scale score; DDS, degree of defecation straining.



**Table S7 The top 10 KEGG pathways and top 10 modules based on PICSRUSt-2 functional profiling from the constantly changed genera.**

| Group | Pathway level2                       |                | Module                                                                 |                |
|-------|--------------------------------------|----------------|------------------------------------------------------------------------|----------------|
|       | Description                          | Mean abundance | Description                                                            | Mean abundance |
| A     | Global and overview maps             | 60008          | Citrate cycle (TCA cycle, Krebs cycle)                                 | 858            |
|       | Carbohydrate metabolism              | 16300          | Reductive citrate cycle (Arnon-Buchanan cycle)                         | 777            |
|       | Amino acid metabolism                | 10594          | Glycolysis (Embden-Meyerhof pathway), glucose => pyruvate              | 712            |
|       | Metabolism of cofactors and vitamins | 6579           | Histidine biosynthesis, PRPP => histidine                              | 687            |
|       | Membrane transport                   | 5694           | Citrate cycle, second carbon oxidation, 2-oxoglutarate => oxaloacetate | 675            |
|       | Energy metabolism                    | 5410           | Inosine monophosphate biosynthesis, PRPP + glutamine => IMP            | 640            |
|       | Translation                          | 5129           | Pentose phosphate pathway (Pentose phosphate cycle)                    | 516            |
|       | Replication and repair               | 4296           | Cobalamin biosynthesis, cobinamide => cobalamin                        | 513            |
|       | Nucleotide metabolism                | 3579           | C5 isoprenoid biosynthesis, non-mevalonate pathway                     | 513            |
|       | Cellular community - prokaryotes     | 3024           | Shikimate pathway, phosphoenolpyruvate + erythrose-4P => chorismate    | 512            |
| B     | Global and overview maps             | 59113          | Glycolysis (Embden-Meyerhof pathway), glucose => pyruvate              | 979            |
|       | Carbohydrate metabolism              | 15334          | F-type ATPase, prokaryotes and chloroplasts                            | 736            |
|       | Amino acid metabolism                | 9499           | Gluconeogenesis, oxaloacetate => fructose-6P                           | 700            |
|       | Energy metabolism                    | 6269           | Histidine biosynthesis, PRPP => histidine                              | 607            |
|       | Metabolism of cofactors and vitamins | 6152           | Reductive pentose phosphate cycle (Calvin cycle)                       | 576            |
|       | Membrane transport                   | 6102           | Inosine monophosphate biosynthesis, PRPP + glutamine => IMP            | 540            |
|       | Translation                          | 4773           | Reductive citrate cycle (Arnon-Buchanan cycle)                         | 514            |
|       | Replication and repair               | 4204           | Pentose phosphate pathway (Pentose phosphate cycle)                    | 512            |
|       | Signal transduction                  | 4178           | Uridine monophosphate biosynthesis, glutamine (+ PRPP) => UMP          | 500            |
|       | Nucleotide metabolism                | 3745           | Shikimate pathway, phosphoenolpyruvate + erythrose-4P => chorismate    | 497            |
| C     | Global and overview maps             | 11409          | Glycolysis (Embden-Meyerhof pathway), glucose => pyruvate              | 229            |
|       | Carbohydrate metabolism              | 3743           | Gluconeogenesis, oxaloacetate => fructose-6P                           | 165            |
|       | Amino acid metabolism                | 1634           | Reductive pentose phosphate cycle (Calvin cycle)                       | 156            |
|       | Energy metabolism                    | 1236           | Reductive pentose phosphate cycle, glyceraldehyde-3P => ribulose-5P    | 136            |
|       | Membrane transport                   | 1204           | F-type ATPase, prokaryotes and chloroplasts                            | 130            |
|       | Metabolism of cofactors and vitamins | 995            | Formaldehyde assimilation, ribulose monophosphate pathway              | 120            |
|       | Translation                          | 774            | Pentose phosphate pathway (Pentose phosphate cycle)                    | 108            |
|       | Replication and repair               | 680            | Histidine biosynthesis, PRPP => histidine                              | 96             |
|       | Nucleotide metabolism                | 635            | Shikimate pathway, phosphoenolpyruvate + erythrose-4P => chorismate    | 92             |
|       | Lipid metabolism                     | 547            | Reductive citrate cycle (Arnon-Buchanan cycle)                         | 90             |

|                     |                                      |                                                  |                                                                     |    |
|---------------------|--------------------------------------|--------------------------------------------------|---------------------------------------------------------------------|----|
| D                   | Global and overview maps             | 3807                                             | Glycolysis (Embden-Meyerhof pathway), glucose => pyruvate           | 68 |
|                     | Carbohydrate metabolism              | 979                                              | Inosine monophosphate biosynthesis, PRPP + glutamine => IMP         | 47 |
|                     | Amino acid metabolism                | 636                                              | Gluconeogenesis, oxaloacetate => fructose-6P                        | 44 |
|                     | Translation                          | 387                                              | Pentose phosphate pathway (Pentose phosphate cycle)                 | 42 |
|                     | Energy metabolism                    | 371                                              | F-type ATPase, prokaryotes and chloroplasts                         | 41 |
|                     | Membrane transport                   | 369                                              | Lysine biosynthesis, succinyl-DAP pathway, aspartate => lysine      | 41 |
|                     | Metabolism of cofactors and vitamins | 361                                              | Glycolysis, core module involving three-carbon compounds            | 39 |
|                     | Replication and repair               | 338                                              | Uridine monophosphate biosynthesis, glutamine (+ PRPP) => UMP       | 39 |
|                     | Nucleotide metabolism                | 278                                              | Shikimate pathway, phosphoenolpyruvate + erythrose-4P => chorismate | 37 |
| Signal transduction | 231                                  | Reductive pentose phosphate cycle (Calvin cycle) | 36                                                                  |    |

For each intervention group, the constant changing genera from the soft clustering analysis were used to formulate the ASV's abundant tables. Based on the tables, PICRUST2 software package (version v2.2.0-b) was used to predict the abundance enriched in the Kyoto Encyclopedia of Genes and Genomes (KEGG) module and pathways to infer microbial functional content, respectively.

**Table S8. The top10 KEGG pathways and top10 modules based on PICSRUSt-2 functional profiling for the differential genera predicting responsiveness.**

| Constipation symptoms | Group | Pathway level2                              |                | Module                                                                 |                |
|-----------------------|-------|---------------------------------------------|----------------|------------------------------------------------------------------------|----------------|
|                       |       | Description                                 | Mean abundance | Description                                                            | Mean abundance |
| BMF increase > 1      | A     | Global and overview maps                    | 4698           | Glycolysis (Embden-Meyerhof pathway), glucose => pyruvate              | 75             |
|                       |       | Carbohydrate metabolism                     | 1094           | Inosine monophosphate biosynthesis, PRPP + glutamine => IMP            | 51             |
|                       |       | Amino acid metabolism                       | 819            | Citrate cycle (TCA cycle, Krebs cycle)                                 | 50             |
|                       |       | Metabolism of cofactors and vitamins        | 516            | Gluconeogenesis, oxaloacetate => fructose-6P                           | 49             |
|                       |       | Energy metabolism                           | 474            | Reductive citrate cycle (Arnon-Buchanan cycle)                         | 49             |
|                       |       | Translation                                 | 411            | NADH:quinone oxidoreductase, prokaryotes                               | 48             |
|                       |       | Replication and repair                      | 348            | Histidine biosynthesis, PRPP => histidine                              | 48             |
|                       |       | Membrane transport                          | 347            | Uridine monophosphate biosynthesis, glutamine (+ PRPP) => UMP          | 48             |
|                       |       | Glycan biosynthesis and metabolism          | 298            | Shikimate pathway, phosphoenolpyruvate + erythrose-4P => chorismate    | 45             |
|                       |       | Nucleotide metabolism                       | 287            | Lysine biosynthesis, succinyl-DAP pathway, aspartate => lysine         | 44             |
|                       | B     | Aging                                       | 295            | Reductive citrate cycle (Arnon-Buchanan cycle)                         | 857            |
|                       |       | Amino acid metabolism                       | 7554           | Citrate cycle (TCA cycle, Krebs cycle)                                 | 764            |
|                       |       | Biosynthesis of other secondary metabolites | 1335           | Citrate cycle, second carbon oxidation, 2-oxoglutarate => oxaloacetate | 723            |
|                       |       | Cancer: overview                            | 304            | Heme biosynthesis, plants and bacteria, glutamate => heme              | 500            |
|                       |       | Cancer: specific types                      | 96             | Histidine biosynthesis, PRPP => histidine                              | 448            |
|                       |       | Carbohydrate metabolism                     | 7442           | Inosine monophosphate biosynthesis, PRPP + glutamine => IMP            | 431            |
|                       |       | Cardiovascular disease                      | 177            | Fumarate reductase, prokaryotes                                        | 429            |
|                       |       | Cell growth and death                       | 778            | Lysine biosynthesis, succinyl-DAP pathway, aspartate => lysine         | 373            |
|                       |       | Cell motility                               | 279            | Arginine biosynthesis, glutamate => acetylcitrulline => arginine       | 357            |
|                       |       | Aging                                       | 295            | Glycolysis (Embden-Meyerhof pathway), glucose => pyruvate              | 345            |
|                       | C     | Global and overview maps                    | 6045           | Glycolysis (Embden-Meyerhof pathway), glucose => pyruvate              | 93             |
|                       |       | Carbohydrate metabolism                     | 1504           | Reductive citrate cycle (Arnon-Buchanan cycle)                         | 83             |
|                       |       | Amino acid metabolism                       | 1103           | Citrate cycle (TCA cycle, Krebs cycle)                                 | 69             |
|                       |       | Energy metabolism                           | 664            | Gluconeogenesis, oxaloacetate => fructose-6P                           | 68             |
|                       |       | Metabolism of cofactors and vitamins        | 655            | Inosine monophosphate biosynthesis, PRPP + glutamine => IMP            | 68             |
|                       |       | Translation                                 | 523            | Histidine biosynthesis, PRPP => histidine                              | 61             |
|                       |       | Replication and repair                      | 481            | Citrate cycle, second carbon oxidation, 2-oxoglutarate => oxaloacetate | 61             |
|                       |       | Nucleotide metabolism                       | 442            | Uridine monophosphate biosynthesis, glutamine (+ PRPP) => UMP          | 58             |

|                    |                                  |                                      |                              |                                                                        |     |
|--------------------|----------------------------------|--------------------------------------|------------------------------|------------------------------------------------------------------------|-----|
|                    | D                                | Membrane transport                   | 341                          | Glycolysis, core module involving three-carbon compounds               | 54  |
|                    |                                  | Signal transduction                  | 329                          | F-type ATPase, prokaryotes and chloroplasts                            | 52  |
|                    |                                  | Global and overview maps             | 15418                        | Glycolysis (Embden-Meyerhof pathway), glucose => pyruvate              | 250 |
|                    |                                  | Carbohydrate metabolism              | 3249                         | F-type ATPase, prokaryotes and chloroplasts                            | 247 |
|                    |                                  | Amino acid metabolism                | 2794                         | Uridine monophosphate biosynthesis, glutamine (+ PRPP) => UMP          | 191 |
|                    |                                  | Metabolism of cofactors and vitamins | 1650                         | Histidine biosynthesis, PRPP => histidine                              | 188 |
|                    |                                  | Energy metabolism                    | 1514                         | Gluconeogenesis, oxaloacetate => fructose-6P                           | 162 |
|                    |                                  | Translation                          | 1427                         | Inosine monophosphate biosynthesis, PRPP + glutamine => IMP            | 159 |
|                    |                                  | Replication and repair               | 1218                         | C5 isoprenoid biosynthesis, non-mevalonate pathway                     | 158 |
|                    |                                  | Nucleotide metabolism                | 1107                         | Lysine biosynthesis, succinyl-DAP pathway, aspartate => lysine         | 156 |
|                    |                                  | Cell motility                        | 1045                         | Shikimate pathway, phosphoenolpyruvate + erythrose-4P => chorismate    | 156 |
|                    |                                  | Signal transduction                  | 1040                         | Lysine biosynthesis, DAP aminotransferase pathway, aspartate => lysine | 144 |
| BSS<br>increase >1 | Group A                          | Global and overview maps             | 8966                         | Heme biosynthesis, plants and bacteria, glutamate => heme              | 119 |
|                    |                                  | Carbohydrate metabolism              | 1766                         | Reductive citrate cycle (Arnon-Buchanan cycle)                         | 115 |
|                    |                                  | Amino acid metabolism                | 1625                         | Cobalamin biosynthesis, cobinamide => cobalamin                        | 110 |
|                    |                                  | Metabolism of cofactors and vitamins | 1280                         | Citrate cycle (TCA cycle, Krebs cycle)                                 | 106 |
|                    |                                  | Energy metabolism                    | 933                          | Citrate cycle, second carbon oxidation, 2-oxoglutarate => oxaloacetate | 104 |
|                    |                                  | Translation                          | 814                          | Glycolysis (Embden-Meyerhof pathway), glucose => pyruvate              | 97  |
|                    |                                  | Membrane transport                   | 768                          | Histidine biosynthesis, PRPP => histidine                              | 95  |
|                    |                                  | Replication and repair               | 685                          | Inosine monophosphate biosynthesis, PRPP + glutamine => IMP            | 92  |
|                    |                                  | Nucleotide metabolism                | 638                          | Methionine biosynthesis, aspartate => homoserine => methionine         | 90  |
|                    | Cellular community - prokaryotes | 443                                  | 3-Hydroxypropionate bi-cycle | 90                                                                     |     |
|                    | Group B                          | None                                 | None                         |                                                                        |     |
|                    | Group C                          | Global and overview maps             | 16926                        | Reductive citrate cycle (Arnon-Buchanan cycle)                         | 310 |
|                    |                                  | Carbohydrate metabolism              | 3847                         | Glycolysis (Embden-Meyerhof pathway), glucose => pyruvate              | 277 |
|                    |                                  | Amino acid metabolism                | 2997                         | Citrate cycle (TCA cycle, Krebs cycle)                                 | 267 |
|                    |                                  | Metabolism of cofactors and vitamins | 1914                         | Citrate cycle, second carbon oxidation, 2-oxoglutarate => oxaloacetate | 263 |
|                    |                                  | Energy metabolism                    | 1719                         | NADH:quinone oxidoreductase, prokaryotes                               | 228 |
|                    |                                  | Translation                          | 1696                         | Inosine monophosphate biosynthesis, PRPP + glutamine => IMP            | 222 |
|                    |                                  | Replication and repair               | 1408                         | Uridine monophosphate biosynthesis, glutamine (+ PRPP) => UMP          | 195 |
|                    |                                  | Glycan biosynthesis and metabolism   | 1218                         | Gluconeogenesis, oxaloacetate => fructose-6P                           | 181 |

|                                      |                                      |                                      |         |                                                                        |       |
|--------------------------------------|--------------------------------------|--------------------------------------|---------|------------------------------------------------------------------------|-------|
|                                      | Group D                              | Nucleotide metabolism                | 1194    | Incomplete reductive citrate cycle, acetyl-CoA => oxoglutarate         | 177   |
|                                      |                                      | Lipid metabolism                     | 860     | KDO2-lipid A biosynthesis, Raetz pathway, non-LpxL-LpxM type           | 171   |
|                                      |                                      | Global and overview maps             | 2023    | Glycolysis (Embden-Meyerhof pathway), glucose => pyruvate              | 31    |
|                                      |                                      | Carbohydrate metabolism              | 429     | Histidine biosynthesis, PRPP => histidine                              | 25    |
|                                      |                                      | Amino acid metabolism                | 367     | Gluconeogenesis, oxaloacetate => fructose-6P                           | 23    |
|                                      |                                      | Metabolism of cofactors and vitamins | 240     | Inosine monophosphate biosynthesis, PRPP + glutamine => IMP            | 21    |
|                                      |                                      | Energy metabolism                    | 206     | Lysine biosynthesis, succinyl-DAP pathway, aspartate => lysine         | 21    |
|                                      |                                      | Translation                          | 190     | Reductive citrate cycle (Arnon-Buchanan cycle)                         | 20    |
|                                      |                                      | Replication and repair               | 159     | Uridine monophosphate biosynthesis, glutamine (+ PRPP) => UMP          | 20    |
|                                      |                                      | Membrane transport                   | 154     | Lysine biosynthesis, DAP aminotransferase pathway, aspartate => lysine | 19    |
|                                      |                                      | Nucleotide metabolism                | 143     | F-type ATPase, prokaryotes and chloroplasts                            | 18    |
|                                      |                                      | Cellular community - prokaryotes     | 113     | Shikimate pathway, phosphoenolpyruvate + erythrose-4P => chorismate    | 18    |
|                                      |                                      | DDS decrease >1                      | Group A | Global and overview maps                                               | 39750 |
| Carbohydrate metabolism              | 9642                                 |                                      |         | Gluconeogenesis, oxaloacetate => fructose-6P                           | 456   |
| Amino acid metabolism                | 6630                                 |                                      |         | Lysine biosynthesis, succinyl-DAP pathway, aspartate => lysine         | 449   |
| Membrane transport                   | 4677                                 |                                      |         | F-type ATPase, prokaryotes and chloroplasts                            | 415   |
| Metabolism of cofactors and vitamins | 4264                                 |                                      |         | Shikimate pathway, phosphoenolpyruvate + erythrose-4P => chorismate    | 393   |
| Energy metabolism                    | 4144                                 |                                      |         | Lysine biosynthesis, DAP aminotransferase pathway, aspartate => lysine | 390   |
| Translation                          | 3130                                 |                                      |         | Histidine biosynthesis, PRPP => histidine                              | 370   |
| Nucleotide metabolism                | 2641                                 |                                      |         | Inosine monophosphate biosynthesis, PRPP + glutamine => IMP            | 366   |
| Replication and repair               | 2625                                 |                                      |         | Glycolysis, core module involving three-carbon compounds               | 353   |
| Signal transduction                  | 2207                                 |                                      |         | Uridine monophosphate biosynthesis, glutamine (+ PRPP) => UMP          | 351   |
| Group B                              | Global and overview maps             |                                      | 1294    | Glycolysis (Embden-Meyerhof pathway), glucose => pyruvate              | 17    |
|                                      | Carbohydrate metabolism              |                                      | 349     | Reductive citrate cycle (Arnon-Buchanan cycle)                         | 17    |
|                                      | Amino acid metabolism                |                                      | 244     | Dicarboxylate-hydroxybutyrate cycle                                    | 15    |
|                                      | Energy metabolism                    |                                      | 129     | Gluconeogenesis, oxaloacetate => fructose-6P                           | 12    |
|                                      | Metabolism of cofactors and vitamins |                                      | 114     | Citrate cycle (TCA cycle, Krebs cycle)                                 | 12    |
|                                      | Translation                          |                                      | 103     | Lysine biosynthesis, succinyl-DAP pathway, aspartate => lysine         | 12    |
|                                      | Membrane transport                   |                                      | 102     | Histidine biosynthesis, PRPP => histidine                              | 12    |
|                                      | Cellular community - prokaryotes     |                                      | 94      | Inosine monophosphate biosynthesis, PRPP + glutamine => IMP            | 12    |
|                                      | Signal transduction                  |                                      | 93      | Methionine biosynthesis, aspartate => homoserine => methionine         | 11    |

|         |  |                                      |        |                                                                        |      |
|---------|--|--------------------------------------|--------|------------------------------------------------------------------------|------|
|         |  | Replication and repair               | 91     | Shikimate pathway, phosphoenolpyruvate + erythrose-4P => chorismate    | 11   |
| Group C |  | Global and overview maps             | 151634 | Glycolysis (Embden-Meyerhof pathway), glucose => pyruvate              | 2209 |
|         |  | Carbohydrate metabolism              | 38916  | F-type ATPase, prokaryotes and chloroplasts                            | 1751 |
|         |  | Amino acid metabolism                | 25304  | Histidine biosynthesis, PRPP => histidine                              | 1616 |
|         |  | Metabolism of cofactors and vitamins | 16928  | Gluconeogenesis, oxaloacetate => fructose-6P                           | 1562 |
|         |  | Membrane transport                   | 16066  | Inosine monophosphate biosynthesis, PRPP + glutamine => IMP            | 1478 |
|         |  | Energy metabolism                    | 14995  | Shikimate pathway, phosphoenolpyruvate + erythrose-4P => chorismate    | 1414 |
|         |  | Translation                          | 12408  | Citrate cycle (TCA cycle, Krebs cycle)                                 | 1378 |
|         |  | Replication and repair               | 10519  | Lysine biosynthesis, succinyl-DAP pathway, aspartate => lysine         | 1343 |
|         |  | Nucleotide metabolism                | 9444   | Reductive citrate cycle (Arnon-Buchanan cycle)                         | 1328 |
|         |  | Signal transduction                  | 8730   | Uridine monophosphate biosynthesis, glutamine (+ PRPP) => UMP          | 1320 |
| Group D |  | Global and overview maps             | 14851  | Reductive citrate cycle (Arnon-Buchanan cycle)                         | 219  |
|         |  | Carbohydrate metabolism              | 4318   | Citrate cycle (TCA cycle, Krebs cycle)                                 | 214  |
|         |  | Amino acid metabolism                | 2913   | Glycolysis (Embden-Meyerhof pathway), glucose => pyruvate              | 203  |
|         |  | Energy metabolism                    | 1504   | V/A-type ATPase, prokaryotes                                           | 184  |
|         |  | Membrane transport                   | 1340   | Pyruvate oxidation, pyruvate => acetyl-CoA                             | 184  |
|         |  | Metabolism of cofactors and vitamins | 1219   | Citrate cycle, second carbon oxidation, 2-oxoglutarate => oxaloacetate | 158  |
|         |  | Signal transduction                  | 1193   | Histidine biosynthesis, PRPP => histidine                              | 138  |
|         |  | Translation                          | 1016   | Gluconeogenesis, oxaloacetate => fructose-6P                           | 137  |
|         |  | Replication and repair               | 998    | Inosine monophosphate biosynthesis, PRPP + glutamine => IMP            | 136  |
|         |  | Cellular community - prokaryotes     | 955    | Dicarboxylate-hydroxybutyrate cycle                                    | 131  |

For each intervention group, the genera from the top 10 in each model with significant difference between the responders and the non-responders were used to formulate the ASV's abundant tables. Based on the tables, PICRUST2 software package (version v2.2.0-b) was used to predict the abundance enriched in the Kyoto Encyclopedia of Genes and Genomes (KEGG) module and pathways.

**Table S9 Dietary and lifestyle counselling materials**

|                                                                                                                                                                                                                                                                                                                                                                                                                                                                                                                                                                                                                                                                                                                                                                                                                                                                                                                                                                                            |
|--------------------------------------------------------------------------------------------------------------------------------------------------------------------------------------------------------------------------------------------------------------------------------------------------------------------------------------------------------------------------------------------------------------------------------------------------------------------------------------------------------------------------------------------------------------------------------------------------------------------------------------------------------------------------------------------------------------------------------------------------------------------------------------------------------------------------------------------------------------------------------------------------------------------------------------------------------------------------------------------|
| 1. Core recommendations of dietary guidelines for the general population                                                                                                                                                                                                                                                                                                                                                                                                                                                                                                                                                                                                                                                                                                                                                                                                                                                                                                                   |
| (a) Eat a variety of foods, cereal based<br>(b) Be active to maintain a healthy body weight<br>(c) Eat plenty of vegetables, fruits, dairy, and soybeans<br>(d) Enjoy fish, poultry, eggs, and lean meats in moderate amounts<br>(e) Limit table salt, cooking oil, added sugar, and alcohol<br>(f) Develop healthy eating habits, avoid food waste                                                                                                                                                                                                                                                                                                                                                                                                                                                                                                                                                                                                                                        |
| 2. Increase water intake<br>Keep water intake between 1.5 and 2.0 L/d.                                                                                                                                                                                                                                                                                                                                                                                                                                                                                                                                                                                                                                                                                                                                                                                                                                                                                                                     |
| 3. Regular exercise<br>Exercise 30~60 min/occasion, at least two times/week.                                                                                                                                                                                                                                                                                                                                                                                                                                                                                                                                                                                                                                                                                                                                                                                                                                                                                                               |
| 4. Keep a good bowel habit<br>Try defecation right after getting up in the morning or within two hours after breakfast. The squat defecation position would make defecation easier. In addition, try to avoid interruption by factors unrelated to defecation when going to the toilet and keep a good defecation habit.                                                                                                                                                                                                                                                                                                                                                                                                                                                                                                                                                                                                                                                                   |
| 5. Basic knowledge of prebiotics and probiotics.<br>Prebiotics are substances that can be selectively utilized by host microorganisms to bring health benefits, with dietary fiber being the most common one. The water-holding capacity of dietary fiber increases the faecal volume. Its fermentability increases the faecal weight and stimulates defecation by optimizing the microflora, thereby relieving constipation. Dietary fiber promotes the growth of intestinal probiotics to facilitate the maintain of intestinal immune function.<br>Probiotics are live microorganisms that, when ingested in adequate amounts, confer health benefits on the host. The functions of probiotics include maintaining the normal intestinal flora and inhibiting pathogenic bacteria, improving and maintaining the intestinal function, involved in the nutrient metabolism of the body, regulating the immune system function, regulating endocrine system, and neuropsychiatric health. |

**Table S10 Assessment and analyses details of gut microbiota**

| Content                                   | Description                                                                                                                                                                                                                                                                                                                                                                                                                                                                                                                                                                                                                                                                                                                                                                                                                                                                                                                                                                                                                                                                                                                                                                                                                                                                                                                                                                                                                                                                                                                                                                                                                                                                                                                                                                                                             |
|-------------------------------------------|-------------------------------------------------------------------------------------------------------------------------------------------------------------------------------------------------------------------------------------------------------------------------------------------------------------------------------------------------------------------------------------------------------------------------------------------------------------------------------------------------------------------------------------------------------------------------------------------------------------------------------------------------------------------------------------------------------------------------------------------------------------------------------------------------------------------------------------------------------------------------------------------------------------------------------------------------------------------------------------------------------------------------------------------------------------------------------------------------------------------------------------------------------------------------------------------------------------------------------------------------------------------------------------------------------------------------------------------------------------------------------------------------------------------------------------------------------------------------------------------------------------------------------------------------------------------------------------------------------------------------------------------------------------------------------------------------------------------------------------------------------------------------------------------------------------------------|
| 16S rRNA sequencing                       | DNA was extracted from stool samples (200 mg) using QIAamp DNA Stool Mini Kit (Qiagen, Hilden, Germany) following the manufacturer's instructions, with additional homogenized steps in a bead beater (FastPrep, Thermo Electron Co, Boston, Massachusetts, USA). The V3-V4 hypervariable regions of the bacteria 16S rRNA gene were amplified with primers 338F (5'-ACTCCTACGGGAGGCAGCAG-3') and 806R (5'-GGACTACHVGGGTWTCTAAT-3') by thermocycler PCR system (GeneAmp 9700, ABI, USA). The purified amplicons were pooled in equimolar and paired-end sequenced ( $2 \times 300$ ) using an Illumina MiSeq platform (Illumina, San Diego, California, USA) according to the standard protocols by Majorbio Bio-Pharm Technology Co. Ltd. (Shanghai, China).                                                                                                                                                                                                                                                                                                                                                                                                                                                                                                                                                                                                                                                                                                                                                                                                                                                                                                                                                                                                                                                           |
| Soft clustering and functional annotation | To identify changing trends of gut microbiota in each intervention group over three stages (week 0, 2, and 4), soft clustering analysis was used for its accuracy and robustness to noise and less information loss using the fuzzy c-means algorithm with time-course data by applying the R package " <i>Mfuzz</i> " <sup>1,2</sup> . For each group over the three stages, several clusters were identified, including continuous increase, continuous decrease, increase-decrease, decrease-increase, and no obvious change with selected parameters (minimum SD = 0, membership value = 0.65, and c optimal = 8). For each intervention group, the mean abundance values of genera that fit the continuous increase or decrease clusters were subsequently used to calculate log <sub>2</sub> fold changes from week 0 to week 2 or 4 per predefined research interests. Herein the log <sub>2</sub> fold changes of genera were presented only if they were exclusively identified in the intervention groups but not in the placebo group. For each intervention group, the constant changing genera from the soft clustering analysis were used to formulate ASV's abundant tables. Based on the tables, PICRUSt2 (version v2.2.0-b) was used to predict the abundance enriched in the Kyoto Encyclopedia of Genes and Genomes (KEGG) module and pathways to infer microbial functional content, respectively. The correlations between the changes in continuously increased/decreased bacterial genera and the changes in constipation symptoms (BMF, BSS, DDS) were analyzed by spearman partial rank correlation. Age and sex-adjusted mean general change levels of particular interest were presented by the relief level of constipation symptom, using general linear model in the R package "emmeans". |



|                                                       |                                                                                                                                                                                                                                                                                                                                                                                                                                                                                                                                                                                                                                                                                                                                                                                                                                                                                                                                                                                                                                                                                                                                                                                                                       |
|-------------------------------------------------------|-----------------------------------------------------------------------------------------------------------------------------------------------------------------------------------------------------------------------------------------------------------------------------------------------------------------------------------------------------------------------------------------------------------------------------------------------------------------------------------------------------------------------------------------------------------------------------------------------------------------------------------------------------------------------------------------------------------------------------------------------------------------------------------------------------------------------------------------------------------------------------------------------------------------------------------------------------------------------------------------------------------------------------------------------------------------------------------------------------------------------------------------------------------------------------------------------------------------------|
| <p>Random forest models and functional annotation</p> | <p>In order to explore the predictive performance of microbiota profiles in responders and non-responders in each intervention group, we defined responders for three scenarios: 1) <math>\geq 1</math> increase in BMF; 2) <math>\geq 1</math> increase in BSS score; 3) <math>\geq 1</math> decrease in DDS. Random forests analysis was used to determine genus-level gut microbiota patterns predicting responders using the R package “<i>caret</i>”. After removing the variable with the variance of 0, 75% of the samples were randomly selected as the training set and the hold-out set was used to evaluate classification accuracy with 500 repetitions. We calculated the area under the receiver operating characteristics curve (AUC) with the cross-validation error with 10000 bootstraps for confidence intervals using the R package “<i>pROC</i>”. The differences between responders and non-responders for the top 10 genera in each model were compared using Wilcoxon signed-rank test. For each intervention group, the genera from the top 10 in each model with significant differences between the responders and the non-responders were used to formulate KEGG module and pathways.</p> |
|-------------------------------------------------------|-----------------------------------------------------------------------------------------------------------------------------------------------------------------------------------------------------------------------------------------------------------------------------------------------------------------------------------------------------------------------------------------------------------------------------------------------------------------------------------------------------------------------------------------------------------------------------------------------------------------------------------------------------------------------------------------------------------------------------------------------------------------------------------------------------------------------------------------------------------------------------------------------------------------------------------------------------------------------------------------------------------------------------------------------------------------------------------------------------------------------------------------------------------------------------------------------------------------------|

1. Kumar L, M EF. Mfuzz: a software package for soft clustering of microarray data. *Bioinformatics* 2007;2(1):5-7. doi: 10.6026/97320630002005 [published Online First: 20070520]
2. Futschik ME, Carlisle B. Noise-robust soft clustering of gene expression time-course data. *J Bioinform Comput Biol* 2005;3(4):965-88. doi: 10.1142/s0219720005001375

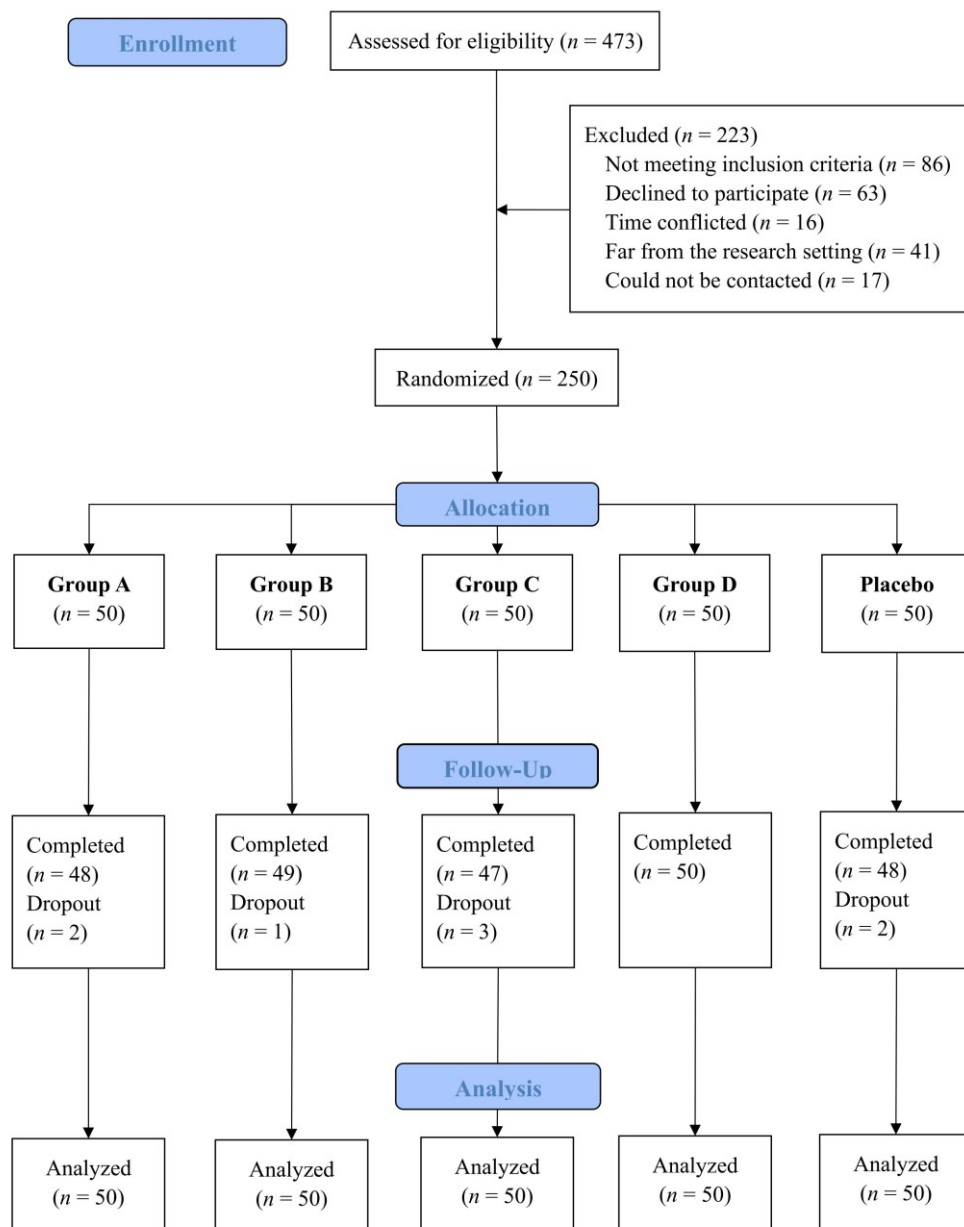

**Figure S1 Study flow.**

## A $\alpha$ -diversity

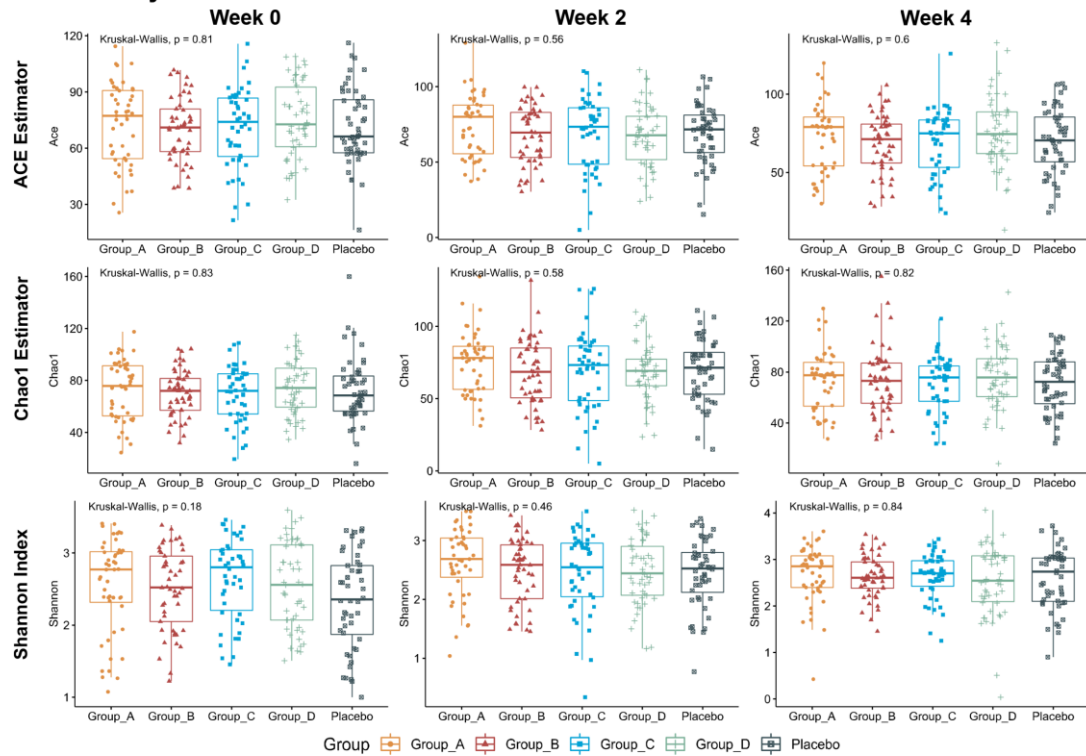

## B PCoA on Genus level

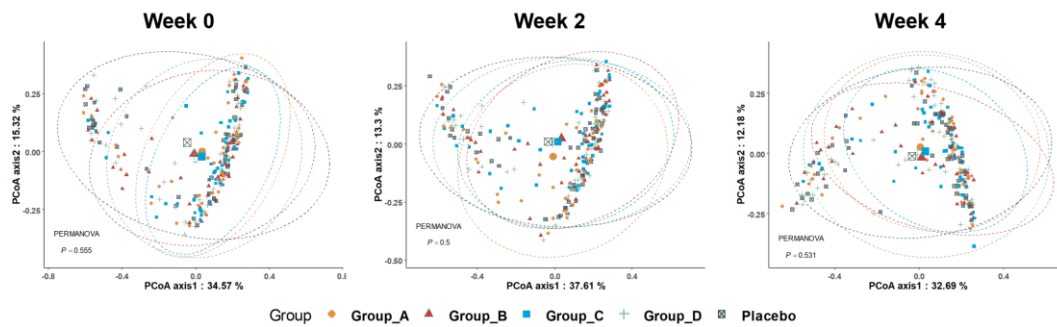

**Figure S2. Microbiota diversity in each stage by group.**

A,  $\alpha$ -Diversity at genus level estimated by Ace, Chao 1, and Shannon estimator. B, PCoA score plots with  $P$  values for PERMANOVA (Permutational multivariate analysis of variance) based on Bray-Curtis distance at genus level.
